# Supplementary material for: A Polar and Nucleotide-Dependent Mechanism of Action for RAD51 Paralogs in RAD51 Filament Remodeling
Source: PubMed Central journal article supplement — Mol Cell. 2016 Dec 1;64(5):926–39. doi: 10.1016/j.molcel.2016.10.020 (PMC5145814; doi:10.1016/j.molcel.2016.10.020), 2016-12-01
Supplement: mmc2.pdf [file mmc2.pdf]

# Molecular Cell

## A Polar and Nucleotide-Dependent Mechanism of Action for RAD51 Paralogs in RAD51 Filament Remodeling

### Graphical Abstract

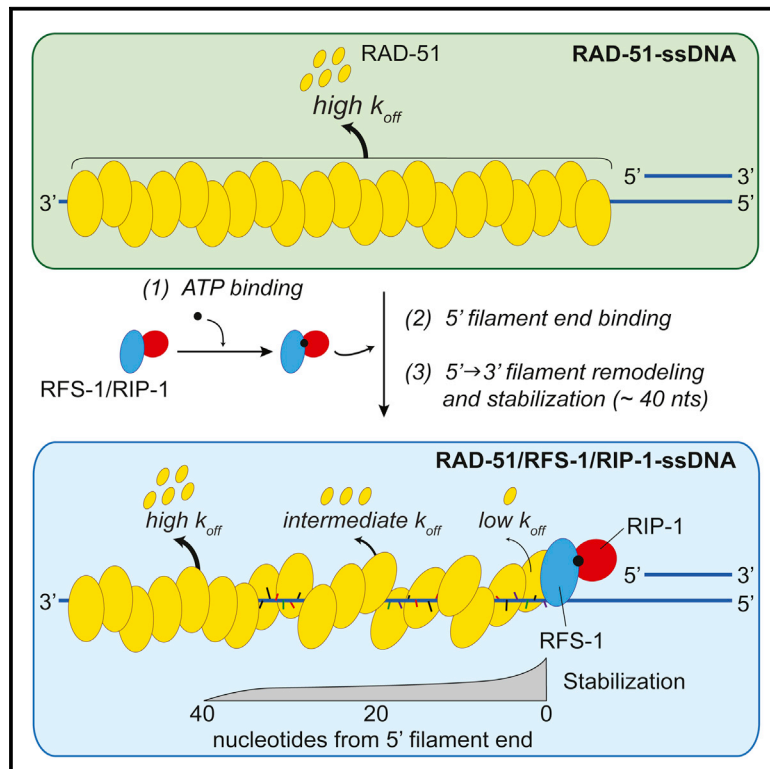

### Authors

Martin R.G. Taylor, Mário Špírek, Chu Jian Ma, ..., Eric C. Greene, Lumir Krejci, Simon J. Boulton

### Correspondence

lkrejci@chemi.muni.cz (L.K.), simon.boulton@crick.ac.uk (S.J.B.)

### In Brief

RAD51 paralogs promote homologous recombination by remodeling RAD51-ssDNA filaments. Here, Taylor et al. demonstrate that RAD51 paralogs mediate remodeling by specifically binding the 5' end of RAD51 filaments in a nucleotide-dependent manner. This propagates a stabilizing effect with 5'→3' polarity distal to their binding site, slowing RAD51 dissociation from DNA.

### Highlights

- A nematode RAD51 paralog complex binds the 5' end of RAD51 pre-synaptic filaments
- Filament binding drives pre-synaptic complex remodeling with 5'→3' polarity
- Pre-synaptic complex remodeling propagates up to 40 nucleotides from the 5' end
- Filament binding is dependent on a nucleotide co-factor, but not ATP hydrolysis

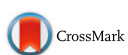

# A Polar and Nucleotide-Dependent Mechanism of Action for RAD51 Paralogs in RAD51 Filament Remodeling

Martin R.G. Taylor,<sup>1,7,8</sup> Mário Špírek,<sup>2,3,7</sup> Chu Jian Ma,<sup>5</sup> Raffaella Carzaniga,<sup>6</sup> Tohru Takaki,<sup>1</sup> Lucy M. Collinson,<sup>6</sup> Eric C. Greene,<sup>5</sup> Lumir Krejci,<sup>2,3,4,\*</sup> and Simon J. Boulton<sup>1,9,\*</sup>

<sup>1</sup>Clare Hall Laboratory, The Francis Crick Institute, South Mimms EN6 3LD, UK

<sup>2</sup>Department of Biology, Masaryk University, 62500 Brno, Czech Republic

<sup>3</sup>International Clinical Research Center, St. Anne's University Hospital in Brno, 62500 Brno, Czech Republic

<sup>4</sup>National Centre for Biomolecular Research, Masaryk University, 62500 Brno, Czech Republic

<sup>5</sup>Department of Biochemistry and Molecular Biophysics, Columbia University Medical Center, New York City, NY 10032, USA

<sup>6</sup>Electron Microscopy Science Technology Platform, Lincoln's Inn Fields Laboratory, The Francis Crick Institute, London WC2A 3LY, UK

<sup>7</sup>Co-first author

<sup>8</sup>Present address: MRC Laboratory of Molecular Biology, Cambridge CB2 0QH, UK

<sup>9</sup>Lead Contact

\*Correspondence: lkrejci@chemi.muni.cz (L.K.), simon.boulton@crick.ac.uk (S.J.B.)

<http://dx.doi.org/10.1016/j.molcel.2016.10.020>

## SUMMARY

Central to homologous recombination in eukaryotes is the RAD51 recombinase, which forms helical nucleoprotein filaments on single-stranded DNA (ssDNA) and catalyzes strand invasion with homologous duplex DNA. Various regulatory proteins assist this reaction including the RAD51 paralogs. We recently discovered that a RAD51 paralog complex from *C. elegans*, RFS-1/RIP-1, functions predominantly downstream of filament assembly by binding and remodeling RAD-51-ssDNA filaments to a conformation more proficient for strand exchange. Here, we demonstrate that RFS-1/RIP-1 acts by shutting down RAD-51 dissociation from ssDNA. Using stopped-flow experiments, we show that RFS-1/RIP-1 confers this dramatic stabilization by capping the 5' end of RAD-51-ssDNA filaments. Filament end capping propagates a stabilizing effect with a 5'→3' polarity approximately 40 nucleotides along individual filaments. Finally, we discover that filament capping and stabilization are dependent on nucleotide binding, but not hydrolysis by RFS-1/RIP-1. These data define the mechanism of RAD51 filament remodeling by RAD51 paralogs.

## INTRODUCTION

Homologous recombination (HR) is a highly conserved mechanism for the repair of DNA double-strand breaks and stalled replication forks. The central reactions of HR are catalyzed by the RAD51 recombinase when it is assembled on single-stranded (ss)DNA as helical RAD-51-ssDNA nucleoprotein filaments, which search for and invade homologous double-

stranded (ds)DNA to form joint molecules. Repair DNA synthesis from the 3' end of the invading strand then copies the correct sequence information from the intact duplex, before resolution of the joint molecules completes repair (Chapman et al., 2012; San Filippo et al., 2008). Failure to efficiently execute HR repair is associated with genome instability and cancer development, as well as the severe congenital disorder Fanconi anemia (Krejci et al., 2012).

HR is positively regulated by various RAD51 accessory factors to ensure its timely completion (San Filippo et al., 2008). HR mediators, such as BRCA2, promote RAD51 filament assembly on ssDNA coated with the ssDNA binding protein RPA (Jensen et al., 2010; Liu et al., 2010; Shahid et al., 2014; Thorslund et al., 2010), while RAD54 promotes RAD51 dissociation from dsDNA after strand invasion (Solinger et al., 2002). These activities ultimately allow these proteins to stimulate strand exchange by RAD51 in vitro (Jensen et al., 2010; Solinger et al., 2002; Thorslund et al., 2010) and promote HR and DNA damage resistance in vivo (Johnson and Jasin, 2001).

Another class of proteins that stimulate HR is the RAD51 paralogs (Chun et al., 2013; French et al., 2002; Johnson et al., 1999; Pierce et al., 1999; Rattray and Symington, 1995; Takata et al., 2001). Although these proteins share significant sequence and/or structural homology with RAD51, they do not exhibit intrinsic recombinase activity, but can stimulate strand exchange by RAD51 (Gaines et al., 2015; Genois et al., 2015; Sigurdsson et al., 2001; Sung, 1997; Taylor et al., 2015). For many years, the mechanism of action of this group of HR regulators was unknown due to the biochemical intractability of recombinant RAD51 paralogs. Recently, we discovered a heterodimeric RAD51 paralog complex from *C. elegans*, RFS-1/RIP-1, which stimulates the strand exchange activity of *C. elegans* RAD-51 and promotes its accumulation/stabilization at stalled replication forks (Taylor et al., 2015; Ward et al., 2007). RFS-1/RIP-1 promotes HR by binding to the pre-synaptic filament and converting it to a stabilized conformation in which the ssDNA is more accessible to degradation by nucleases and the overall flexibility of the

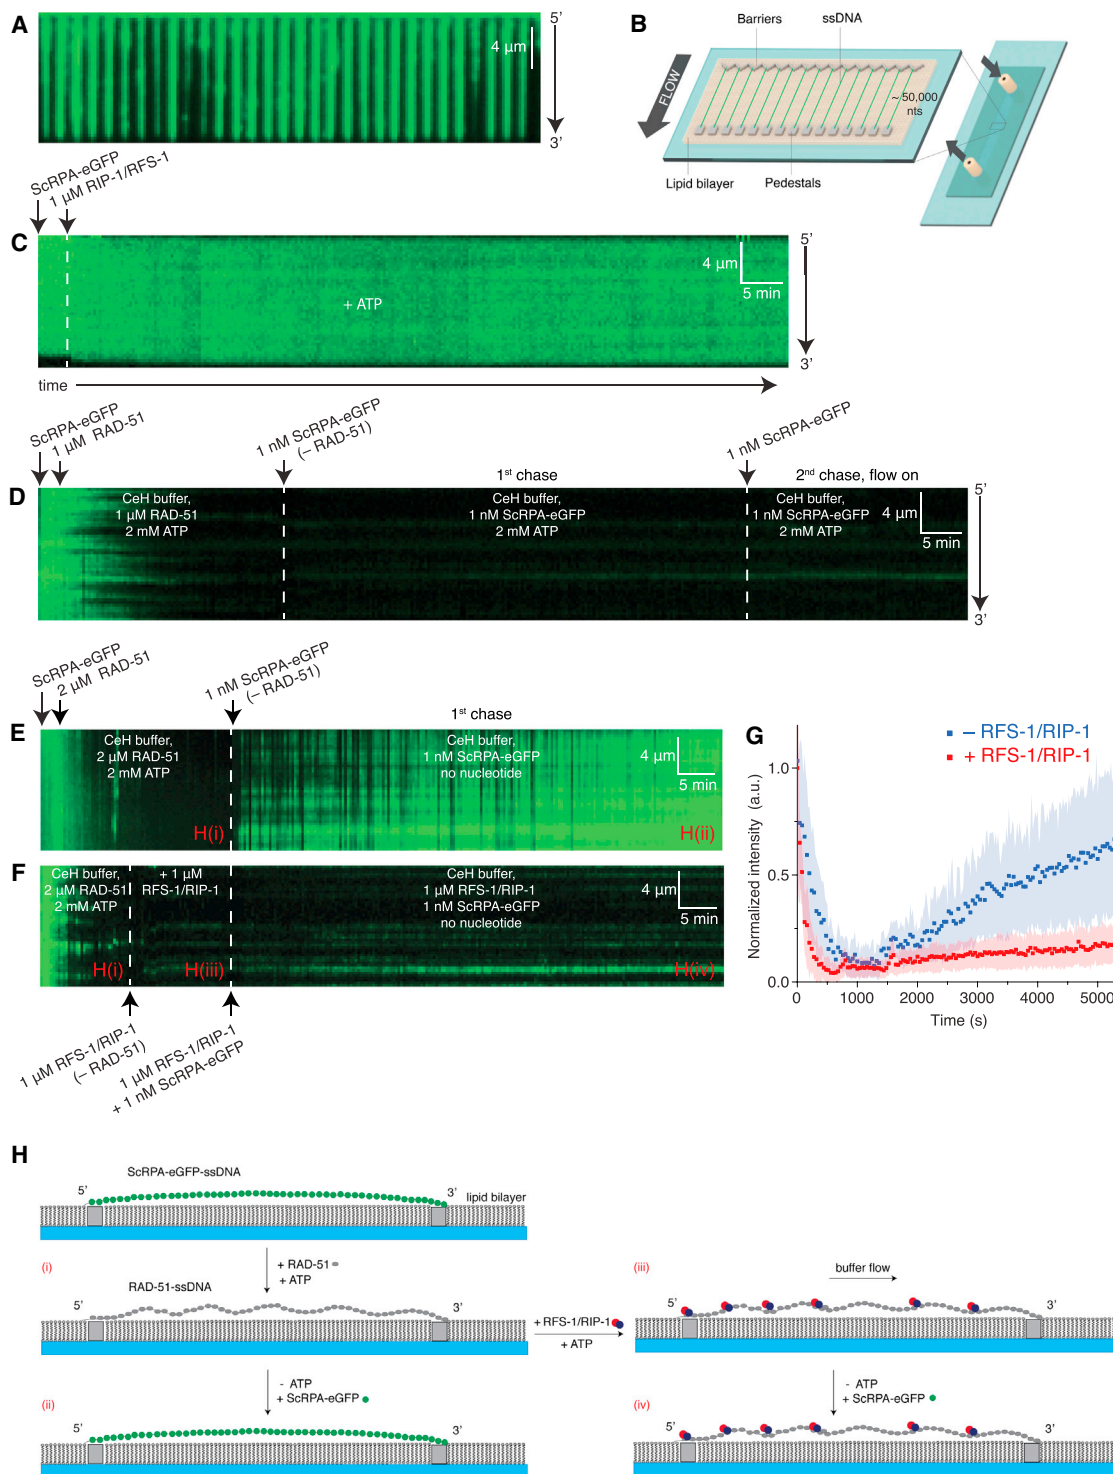

**Figure 1. RFS-1/RIP-1 Shuts Down RAD-51-ssDNA Filament Dissociation**

(A) Wide-field image of extended ScRPA-eGFP-ssDNA filaments, each anchored at both ends.

(B) Schematic depiction of (A) showing underlying ssDNA curtains anchored to the flow cell.

(C) Kymogram of a single filament over time in the absence of buffer flow. The ScRPA-eGFP complex is unperturbed by 1  $\mu$ M RIP-1/RFS-1 (pre-incubated with 2 mM ATP for 10 min), as evident by the persistent GFP signal.

(D) RAD-51 is protected from replacement by ScRPA-eGFP in the presence of ATP both with and without flow, as indicated by the lack of ScRPA-eGFP binding.

(legend continued on next page)

filament is increased. This represents a previously unknown HR stimulatory mechanism, which we named filament “remodeling”. RFS-1 mutants defective in remodeling fail to stimulate RAD-51 strand invasion activity (Taylor et al., 2015), defining remodeling as a critical mechanism of HR stimulation by RFS-1/RIP-1.

In this study, we sought to better understand the mechanism by which RAD51 paralogs execute RAD51 filament remodeling and stabilization. We present evidence that RFS-1/RIP-1 binds to the 5′ end of individual RAD-51-ssDNA filaments and mediates remodeling in a 5′→3′ direction, in a manner dependent on ATP binding, but not hydrolysis by the complex. This blocks the turnover of RAD-51 from ssDNA, thus stabilizing the pre-synaptic filament in an active state. Together, these data define the mechanism of RAD51 filament remodeling and HR enhancement by RAD51 paralogs.

## RESULTS

### RFS-1/RIP-1 Shuts down RAD-51 Dissociation from ssDNA

To investigate the mechanism by which RAD51 paralogs stabilize pre-synaptic filaments, we monitored the stability of RAD-51 filaments assembled on long (approximately 50 kb) ssDNA curtains using the rebinding of fluorescently labeled yeast RPA to naked ssDNA (ScRPA-eGFP, hereafter abbreviated to RPA) (Figures 1A and 1B) (Gibb et al., 2014a; Qi et al., 2015). RPA binds ssDNA with high affinity (Wold, 1997), and a molar excess RFS-1/RIP-1 (1 μM) was unable to outcompete RPA binding to ssDNA curtains (Figure 1C), consistent with the low ssDNA affinity of RFS-1/RIP-1 (Taylor et al., 2015). Like yeast Rad51 (Qi et al., 2015), 1 μM RAD-51 effectively displaced RPA from the ssDNA, as observed by the loss of eGFP fluorescence signal from ssDNA curtains (Figure 1D). The rate of RPA displacement was increased at 2 μM RAD-51 (Figure 1E), which was used for subsequent experiments to ensure rapid and complete filament formation. Similar to yeast Rad51 (Gibb et al., 2014b; Qi et al., 2015), RAD-51-ssDNA filaments remained stable when free RAD-51 was removed and replaced by RPA as long as ATP was maintained in the buffer (Figures 1E and 1F). In contrast, transfer into buffer without nucleotide co-factors drove the rapid disassembly of RAD-51 filaments and re-establishment of the fluorescent RPA signal (Figures 1E and 1G).

Next, RAD-51 filaments formed in the presence of ATP were incubated with 1 μM RFS-1/RIP-1, while maintaining ATP in the buffer. Buffer with RPA, but without ATP, was then flowed onto the curtains while maintaining 1 μM RFS-1/RIP-1 in free solution to maintain its association from filaments. In contrast to RAD-51 alone, we observed a striking stabilization of the filaments induced

by RFS-1/RIP-1, which persisted for over an hour (Figures 1F and 1G). This result demonstrates that RFS-1/RIP-1 shuts down RAD-51 turnover from ssDNA even when ATP is removed from the buffer (Figure 1H). This also suggests that RFS-1/RIP-1-mediated filament remodeling locks RAD-51 onto ssDNA by reducing its dissociation rate ( $k_{off}$ ). We next sought to determine the mechanism of action of RFS-1/RIP-1 in filament stabilization.

### RFS-1/RIP-1 Binds the 5′ Ends of RAD-51-ssDNA Filaments

We previously employed immuno-gold labeling with electron microscopy to show that RFS-1/RIP-1 preferentially binds to the ends of RAD-51-ssDNA filaments compared to the filament body, which was only ever observed at one end and never both (Taylor et al., 2015). ssDNA molecules are intrinsically 5′→3′ polar with respect to the sugar-phosphate backbone, and crystal structures of the yeast Rad51 (Conway et al., 2004) and bacterial RecA (homolog of Rad51) (Chen et al., 2008) filaments assembled on ssDNA have also revealed a structural polarity in the filament with respect to the underlying DNA. We therefore considered the possibility that RFS-1/RIP-1 recognizes the intrinsic polarity of the ssDNA and/or RAD-51-ssDNA filament and binds at an interface exposed on one end, but not the other.

Intriguingly, RFS-1/RIP-1 drives a reduction in the fluorescence of RAD-51-ssDNA filaments formed on a 5′-Cy3-labeled 43-mer oligonucleotide in a stopped-flow system, representing an alteration in the biophysical properties of the RAD-51-ssDNA filament (Taylor et al., 2015). We reasoned this fluorescence reduction may reflect the binding of RFS-1/RIP-1 at the 5′ end, and that if the end binding observed in electron microscopy was random with respect to the underlying DNA polarity, then an equivalent fluorescence reduction should be observed on an oligonucleotide Cy3-labeled at the 3′ end. However, mixing RFS-1/RIP-1 with RAD-51-ssDNA filaments formed on DNA labeled with Cy3 at the 3′ end in stopped flow conferred no such reduction in fluorescence (Figures 2A and 2B), suggesting RFS-1/RIP-1 specifically binds the 5′ end. We also monitored the effect of RFS-1/RIP-1 on the fluorescence of RAD-51 filaments formed on internally Cy3-labeled oligonucleotides, in which the Cy3 was placed after the 11<sup>th</sup> or 22<sup>nd</sup> nucleotide (Int(11)-Cy3 and Int(22)-Cy3, respectively) from the 5′ end. The fluorescence of these filaments was also unaffected by RFS-1/RIP-1 (Figures 2A and 2B), confirming that RFS-1/RIP-1 is likely to predominantly engage with the filament end compared with the filament body. We verified that all four oligonucleotides exhibit an increase in Cy3 fluorescence upon mixing with RAD-51 in stopped flow, corresponding to RAD-51 nucleation on DNA (Figures S1A and S1B), and directly confirmed RAD-51 filament formation occurred with similar efficiency on all four

(E) After RAD-51 filament assembly, free protein and ATP were washed out of the solution and the filament was allowed to disassemble in buffer lacking nucleotide and containing 1 nM ScRPA-eGFP, demonstrating the dependence of RAD-51 on ATP for stability. ScRPA-eGFP binding serves as a proxy for RAD51 dissociation. (F) RIP-1/RFS-1 (pre-incubated with 2 mM ATP for 10 min) is able to bypass the ATP requirement for RAD-51 filament stability. The RIP-1/RFS-1 is first incubated with the RAD-51 filament in the presence of ATP for 10 min before ATP was washed away from the flow cell. The flow cell was chased with RFS-1/RIP-1 and 1 nM ScRPA-eGFP to monitor for disassembly.

(G) Quantitation of the intensity of the ScRPA-eGFP signal over the time course of the experiment for the data in (E) and (F).

(H) Schematic depiction of RAD-51-ssDNA filament stabilization by RFS-1/RIP-1 in this assay. The images labeled (i)–(iv) represent the indicated observations in (E) and (F).

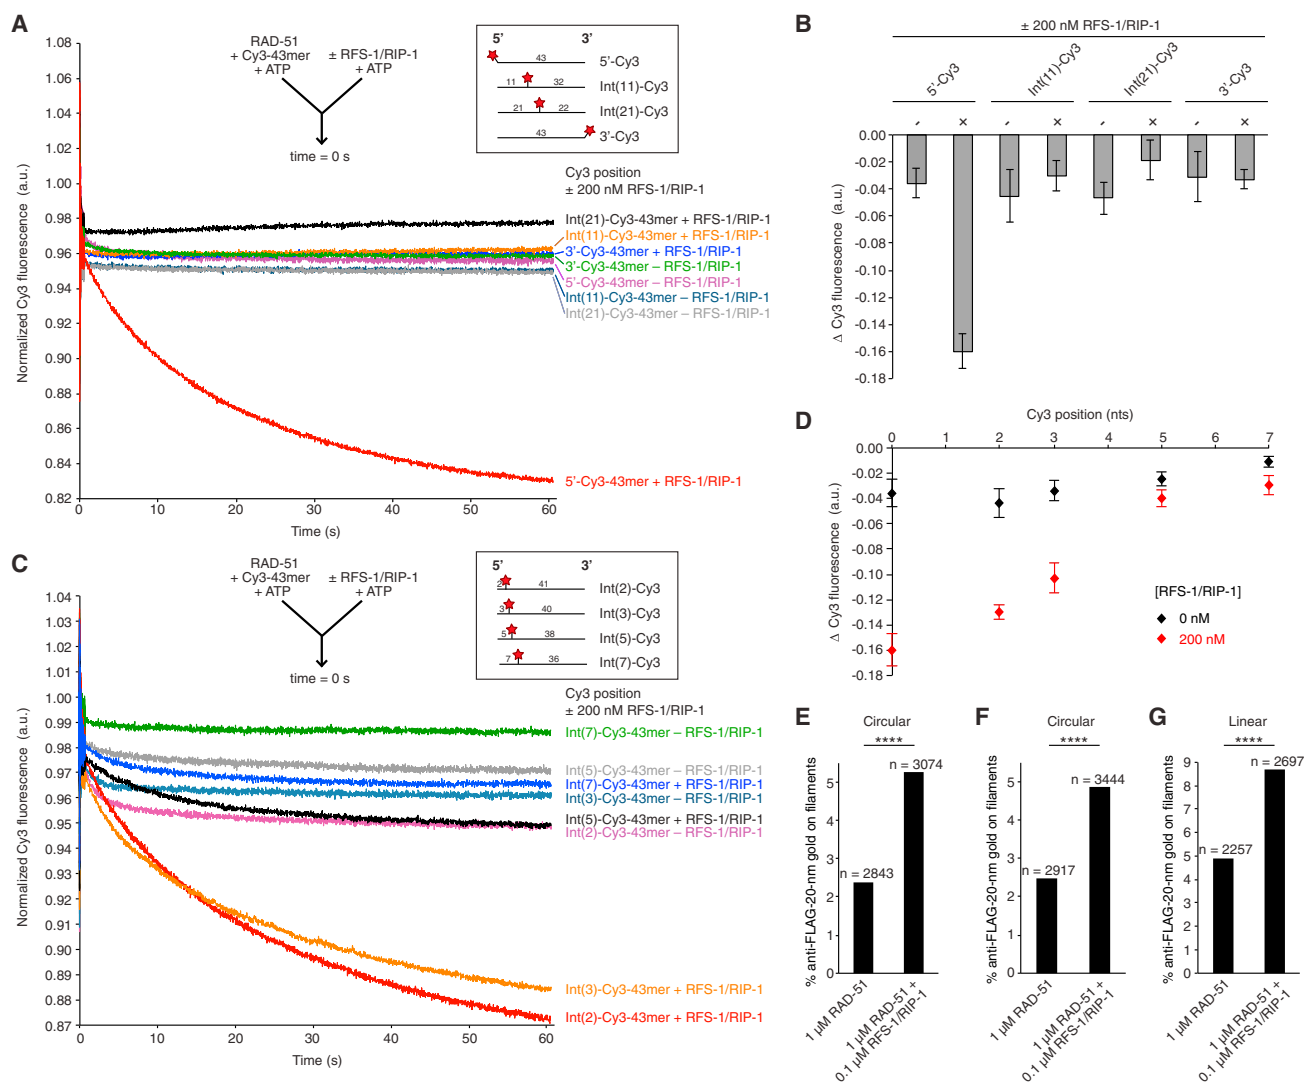

**Figure 2. RFS-1/RIP-1 Binds the 5' End of Individual RAD-51-ssDNA Filaments**

(A and C) Average normalized Cy3-43-mer fluorescence profiles plotted as a function of time. The arrow indicates the components of the two syringes rapidly mixed at the 0 s time point in a stopped-flow instrument. The schematics of the different Cy3 label positions are shown in the inset. The RAD-51-ssDNA filaments pre-formed with 1 μM RAD-51 + 15 nM Cy3-43-mer for 10 min were mixed with buffer ± 200 nM RFS-1/RIP-1. 5'-, Int(11)-, Int(22)-, and 3'-Cy3 constructs (n = 5–9) (A). Int(2)-, Int(3)-, Int(5)-, and Int(7)-Cy3 constructs (n = 5–8) (C).

(B) Graph of average Δ Cy3 fluorescence for the data presented in (A) (the error bars represent SD).

(D) Graph of Cy3 position-dependence of Δ Cy3 fluorescence in the presence of RFS-1/RIP-1 for the data presented in (A) (5'-Cy3) and (C) (other constructs) (the error bars represent SD).

(E) Quantification of % anti-FLAG-20-nm gold particle binding to RAD-51-ssDNA filaments ± RFS-1/RIP-1 formed on circular ssDNA.

(F) Quantification of an independent experimental repeat for the same experiment in (E).

(G) Quantification of % anti-FLAG-20-nm gold particle binding to RAD-51-ssDNA filaments ± RFS-1/RIP-1 formed on linearized ssDNA. \*\*\*\*Two-tailed Chi-square test of independence,  $p < 0.0001$ . See also [Figure S1](#).

oligonucleotides by electrophoretic mobility shift assay (EMSA) ([Figure S1D](#)). Intriguingly, we observed that the rate of ssDNA binding was reduced for RAD-51 binding near the 3' label, but was faster on the other three constructs ([Figure S1C](#)). These data are consistent with RAD-51 filament extension displaying either a unidirectional polarity for the 5' → 3' direction or bidirectional extension that occurs faster in the 3' → 5' direction than 5' → 3'. Notably, similar differences in the rate of fluorescence in-

crease when monitoring 5' and 3' Cy3 labels have also been observed for the assembly of yeast Rad51 on DNA in ensemble stopped-flow ([Antony et al., 2009](#)) and single molecule protein-induced fluorescence enhancement (PIFE) studies ([Hwang and Myong, 2014](#); [Qiu et al., 2013](#)). Our results therefore support a conserved preference in directionality of filament extension on naked ssDNA between yeast Rad51 and nematode RAD-51. However, the kinetic profiles of filament formation for both

proteins display several phases suggesting further complexities in this process (Antony et al., 2009).

The reduction in fluorescence induced by RFS-1/RIP-1 on RAD-51 filaments pre-formed on 5' Cy3-labeled ssDNA could represent binding of RFS-1/RIP-1 to the 5' end or the conformational change in the remodeled filament (Taylor et al., 2015). To investigate this, we first expanded the tested range of labeled oligonucleotides to those in which the Cy3 was placed after the second, third, fifth, or seventh nucleotide (Int(2)-Cy3, Int(3)-Cy3, Int(5)-Cy3, and Int(7)-Cy3, respectively) in the same stopped-flow experimental setup. We observed a clear length dependency in the magnitude of fluorescence reduction conferred by RFS-1/RIP-1 (Figures 2C and 2D). Significantly, there was a linear relationship between magnitude of fluorescence reduction and label position for the Cy3 labels between 0–5 nucleotides from the 5' end (Figure 2D). This is consistent with the fluorescence reduction reflecting RFS-1/RIP-1 binding at the 5' end, such that increasing distances away from the 5' end renders the fluorophore less sensitive to changes in the environment induced by RFS-1/RIP-1 binding.

We previously demonstrated in stopped-flow experiments that at equilibrium, the final fluorescence of RAD-51-ssDNA in the presence of RFS-1/RIP-1 is intermediate to naked 5' Cy3-43-mer ssDNA and RAD-51-ssDNA alone (Taylor et al., 2015). The mechanism of fluorescence reduction due to RFS-1/RIP-1 binding to the 5' end of the filament may represent a modulation of the efficiency of RAD-51-induced PIFE, such that the overall equilibrium PIFE of 5' Cy3-labeled ssDNA for the RAD-51/RFS-1/RIP-1 complex is lower than that for RAD-51 alone. Recent evidence suggests that Cy3 PIFE arises due to decreased photoisomerization of the dye to the non-fluorescent *cis* when sterically constrained by protein (Stennett et al., 2015). Indeed, our single molecule fluorescence resonance energy transfer (FRET) studies also established that RFS-1/RIP-1 converts RAD-51-ssDNA filaments to a more flexible conformation (Taylor et al., 2015). As such, the RFS-1/RIP-1-bound filament is expected to be less sterically constrained nearby the 5' Cy3 dye, accounting for rapid photoisomerization and reduced PIFE. Furthermore, PIFE exhibits a strong and linear sensitivity to distance between the protein binding site and label, with significant effects induced in the 0–30 Å range (Hwang et al., 2011; Hwang and Myong, 2014). Given that the average rise per nucleotide along the axis of ssDNA within the RAD51 filaments is 5.1 Å (Yu et al., 2001), one would predict modulation of RAD-51 PIFE due to RFS-1/RIP-1 filament association at the 5' end should be detectable up to 5–6 nucleotides (25.5–30.6 Å) from the 5' end, but no further and decline linearly with distance, which is in very good agreement with our experimental data (Figure 2D). Notably, the ssDNA conformation in RecA-ssDNA filaments is non-uniform: for any given triplet, the first two nucleotides exhibit a rise similar to B-DNA, but the third is greatly stretched (Chen et al., 2008). This might be expected to result in a non-linear dependency between PIFE modulation and distance from the RFS-1/RIP-1 binding site within the 0–30 Å range. However, the register of one filament relative to another is likely to be random and therefore in the population of filaments monitored in stopped-flow measurements, this nuance is lost due to averaging.

### RFS-1/RIP-1 Recognizes an Interface Exposed at the 5' End of the Filament, but Not the 5' End of the Underlying ssDNA

We next examined if RFS-1/RIP-1 binding to the 5' end of the filament requires a free 5' DNA end or if the filament end defined by the terminal RAD-51 protomer is sufficient. To test this, we analyzed RFS-1/RIP-1 binding to RAD-51 filaments formed on circular ssDNA, which lacks DNA ends, by immuno-gold labeling and electron microscopy. Filaments formed on circular ssDNA tended to clump together more on the grid (Figure S1E) compared to filaments on linear ssDNA (Figure S1F), consistent with the constrained path of closed ssDNA molecules. Using anti-FLAG-20-nm gold conjugates directed against the FLAG tag on RIP-1, we observed RFS-1/RIP-1 binding to filaments assembled on both linear and circular ssDNA (Figures 2E–2G and S1E–S1J). This suggests RFS-1/RIP-1 primarily recognizes the 5' filament end rather than the underlying 5' DNA end. Furthermore, the ssDNA curtains used to demonstrate RAD-51-ssDNA filament stabilization by RFS-1/RIP-1 (Figure 1) are anchored to the flow cell at both ends and are therefore effectively endless. Together, these observations suggest that the 5' end of ssDNA is not a major determinant of the structure recognized by RFS-1/RIP-1. In addition, the likely substrate for RFS-1/RIP-1 *in vivo* is a RAD-51 filament loaded at a ssDNA gap or 3' overhang ssDNA at resected double strand breaks, which lack naked 5' ssDNA ends.

### RFS-1/RIP-1 Propagates Remodeling and Stabilization of RAD-51-ssDNA Filaments beyond Immediate Proximity to the 5' End

Rather than representing 5' filament end binding, an alternative interpretation of the stopped-flow data in Figure 2 is that the fluorescence reduction induced by RFS-1/RIP-1 reflects the altered conformation of the remodeled RAD-51-ssDNA filament, with remodeling restricted to a short section of the filament extending 5–7 nucleotides from the 5' end. We also previously demonstrated DNaseI sensitization by RFS-1/RIP-1 on filaments formed on 5' fluorescently labeled oligonucleotides (Taylor et al., 2015), which could formally represent a localized conformational change at the 5' filament end, since only cleavage products retaining the 5' fluorescent label are detectable. Similarly, we previously only tested filament stabilization by RFS-1/RIP-1 using 5' labeled oligonucleotides.

To distinguish between these possibilities, we sought to determine if these properties of remodeling propagate beyond this restricted region close to the 5' filament end. We first performed nuclease protection assays on a 61-mer substrate fluorescently labeled at either the 5' or 3' end (Figure 3A). Interestingly, in the presence of RAD-51, both substrates were protected to a similar extent (Figure 3A), but the pattern of degradation products was different (Figure S2). Longer degradation products were enriched for the 5' construct and shorter products enriched for the 3' construct, suggesting DNaseI exhibits a degree of sequence preference in its cleavage of ssDNA, as for dsDNA (Herrera and Chaires, 1994), and that cleavage events nearer the 3' end of this oligonucleotide predominate. Importantly, in the presence of RFS-1/RIP-1, ssDNA degradation and formation of all cleavage products, regardless of length, was enhanced on

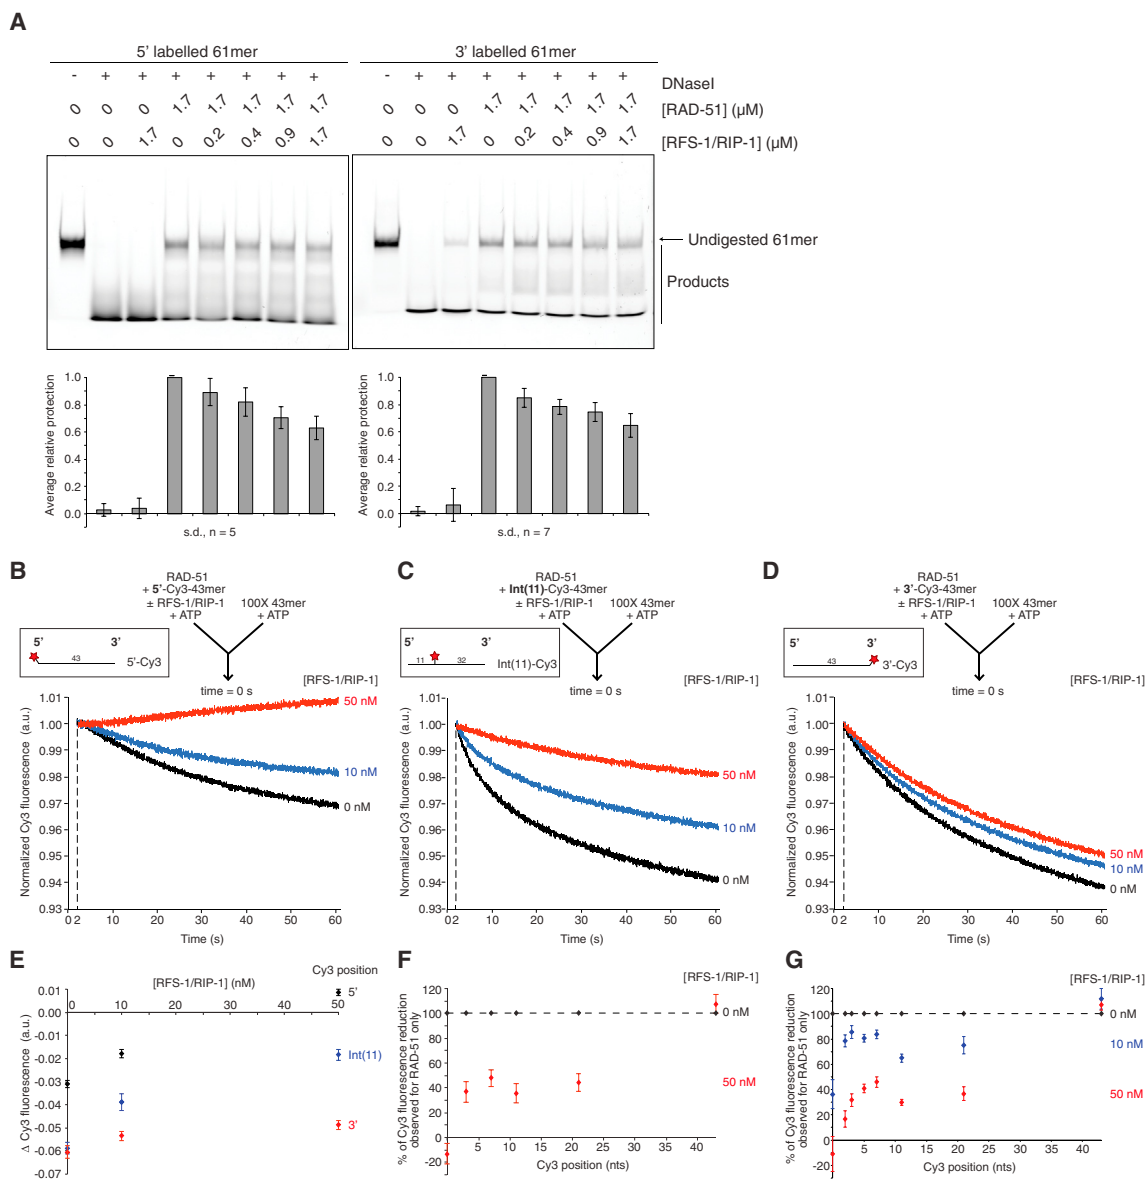

### Figure 3. RFS-1/RIP-1 Induces Remodeling throughout RAD-51-ssDNA Filaments a Significant Distance beyond the 5' End

(A) DNaseI protection assay on protein-DNA complexes formed by RAD-51 and RFS-1/RIP-1 on 5' or 3' fluorescently labeled 61-mer ssDNA. The products were resolved by native PAGE. The average extent of protection relative to RAD-51 only samples is quantified.

(B–D) Average normalized Cy3-43-mer fluorescence profiles plotted as a function of time. The arrow indicates the components of the two syringes rapidly mixed at the 0 s time point in a stopped-flow instrument. The RAD-51-ssDNA filaments pre-formed with 1  $\mu\text{M}$  RAD-51 + 15 nM Cy3-43-mer and indicated concentrations of RFS-1/RIP-1 for 10 min were mixed with 100-fold excess unlabeled 43-mer ( $n = 9–11$ ). 5'-Cy3 construct (B); Int(11)-Cy3 construct (C); and 3'-Cy3 construct (D).

(E) Graph of RFS-1/RIP-1 concentration-dependence of  $\Delta$  Cy3 fluorescence for the data presented in (B)–(D).

(F) Graphs of  $\Delta$  Cy3 fluorescence in the presence of RFS-1/RIP-1 as a % of  $\Delta$  Cy3 fluorescence for RAD-51 only samples on constructs Cy3-labeled 5', 3', 3, 7, 11, or 21 nt from the 5' end for the data presented in Figures S3A–S3F ( $n = 6–8$ ; the error bars represent SD).

(G) Graphs of  $\Delta$  Cy3 fluorescence in the presence of RFS-1/RIP-1 as a % of  $\Delta$  Cy3 fluorescence for RAD-51 only samples on constructs Cy3-labeled 5', 3', 2, 3, 5, 7, 11 or 21 nt from the 5' end for the data presented in Figures S3G–S3N ( $n = 6–8$ ; the error bars represent SD).

See also Figures S2 and S3.

both constructs (Figures 3A and S2). This suggests that the DNaseI sensitization induced by RFS-1/RIP-1 reflects filament remodeling, rather than 5' end binding, since the effect also propagates along the filament to cleavage sites closer to the 3' end than the 5' end.

Second, we tested for propagation of RAD-51 filament stabilization. Initially, we compared the stability of filaments formed on the 5'-Cy3, Int(11)-Cy3, and 3'-Cy3 constructs used in Figure 2 to unlabeled competitor DNA (Figures 3B–3E). In the absence of RFS-1/RIP-1, the magnitude of fluorescence reduction induced

by mixing RAD-51 filaments with 100-fold excess of unlabeled competitor DNA corresponding to RAD-51 dissociation was smallest for the 5' Cy3 labeled DNA (Figure 3B) and larger, but roughly equivalent, for the Int(11)-Cy3 and 3'-Cy3 constructs (Figures 3C and 3D). This observation is consistent with the fact that the fluorophores in these positions fluoresce more intensely upon RAD-51 binding than Cy3 at the 5' position (Figures S1A and S1B) and therefore would be expected to exhibit a larger fluorescence reduction to return to the intensity associated with naked DNA.

In the presence of RFS-1/RIP-1, strong, concentration-dependent stabilization against filament disruption by competitor DNA was observed for the 5'-Cy3 construct, with 50 nM RFS-1/RIP-1 sufficient to almost completely stabilize the filament as previously reported (Figure 3B) (Taylor et al., 2015). However, no significant stabilization was observed when monitoring the 3' Cy3-labeled oligonucleotide (Figure 3D). In contrast, the Int(11)-Cy3 oligonucleotide exhibited a clear, concentration-dependent stabilization, but the extent of stabilization at both concentrations of RFS-1/RIP-1 was smaller than for the 5'-Cy3 construct (Figure 3C). Given that RFS-1/RIP-1 did not induce a fluorescence reduction in filaments formed on the Int(11)-Cy3 construct (Figure 2A), these data support the view that the fluorescence reduction reported in Figure 2 represents the binding of RFS-1/RIP-1 to the 5' end, which only induces a change in the biophysical properties of the Cy3 label when it is in close proximity (approximately 5–7 nucleotides) to the 5' end and not the remodeling of the filament. However, RFS-1/RIP-1 induces a remodeled conformation that propagates along the filament at least as far as 11 nucleotides from the 5' end, since the filament exhibits partial stabilization at this position.

These results raised the possibility that filament remodeling and stabilization could be propagated through the filament from the 5' end with a 5'→3' polarity following RFS-1/RIP-1 binding, such that RAD-51 protomers nearer the 5' end are more significantly stabilized. This model is supported by the fact that the magnitude of stabilization observed on the Int(11)-Cy3 construct is intermediate to that on the 5'-Cy3 construct, whereas the 3'-Cy3 construct exhibited no stabilization (Figure 3E). To monitor possible stabilization propagation further, we expanded the competition experiments to the other internally labeled constructs used in Figure 2. We also quantified the extent of stabilization observed with RFS-1/RIP-1 relative to RAD-51 alone (Figures 3F and 3G), rather than analyzing the absolute fluorescence reduction (Figure 3E). This normalization accounts for the inherent difference in the magnitude of Cy3 fluorescence changes associated with RAD-51 binding (Figures S1A and S1B) and dissociation (Figures 3B–3D and S3) from the different constructs, allowing exclusive analysis of the position-dependency of stabilization with respect to 5' filament end binding of RFS-1/RIP-1. If the 5' end propagation model is true, we predicted that there would be a direct relationship between Cy3 label position and the extent of filament stabilization by a fixed concentration of RFS-1/RIP-1, analogous to that observed in Figure 2D.

Strikingly, in two independent experiments (Figures 3F, 3G, and S3), we failed to detect a strong correlation between the extent of filament stabilization and Cy3 label position within the

first 21 nucleotides. As before, 50 nM RFS-1/RIP-1 was sufficient to completely stabilize the filament when monitoring the 5' end, whereas no stabilization was observed at the 3' end. In contrast, all internal labels tested showed a concentration-dependent (Figures 3G and S3G–S3N), but intermediate stabilization effect, even as close as two nucleotides from the 5' end (Figures 3F and 3G). These results may be explained by a model in which RFS-1/RIP-1 exhibits two distinct modes of filament stabilization. First, RFS-1/RIP-1 binding to the 5' end may sterically impair RAD-51 dissociation from the DNA entirely, accounting for the dramatic stabilization exhibited by 50 nM RFS-1/RIP-1 at the 5' end. Second, RFS-1/RIP-1-induced filament remodeling may also alter the biophysical properties of the filament, which slows the rate of RAD-51 dissociation from the DNA internally, and this propagates along the filament at least as far as 21 nucleotides from the 5' end. This would account for the intermediate stabilization effect exhibited at Cy3 label positions from 2–21 nucleotides from the 5' end.

#### RFS-1/RIP-1 Propagates Filament Stabilization from the 5' End with 5'→3' Polarity

To further test the 5' end propagation model, we tested if stabilization declined between 21 nucleotides and the 3' end by expanding the range of oligonucleotides analyzed to include those labeled after the 33<sup>rd</sup>, 38<sup>th</sup>, or 41<sup>st</sup> nucleotide (Int(33)-Cy3, Int(38)-Cy3, and Int(41)-Cy3, respectively), as well as the 5'-Cy3, Int(21)-Cy3 and 3'-Cy3 constructs (Figures 4A–4G). We compared the stability of RAD-51 in the presence or absence of 50 nM RFS-1/RIP-1 on these constructs and observed a profound length-dependent decline in the magnitude of stabilization (Figure 4G). Specifically, a similar magnitude of stabilization was observed on the Int(21)-Cy3 construct in the presence of RFS-1/RIP-1 to previous experiments (Figures 3F, 3G, S3E, S3M, 4B, and 4G), with a fluorescence reduction of approximately 40%–50% of that for RAD-51 only. As the Cy3 dye position was moved toward the 3' end, this fluorescence reduction relative to RAD-51 increased progressively (Int(33)-Cy3: 61%; Int(38)-Cy3: 68%; Int(41)-Cy3: 82%; and 3'-Cy3 [43 nucleotides]: 99%). Therefore, the cutoff point where significant stabilization was no longer detectable occurs approximately 40 nucleotides from the 5' end (Figure 4G). These results demonstrate filament stabilization propagates a significant distance through the length of the filament from the 5' end with 5'→3' polarity.

Next, we wished to verify that the failure of RFS-1/RIP-1 to stabilize the filament at a 3' end and confer weak stabilization at the Int(38)-Cy3 and Int(41)-Cy3 labels was due to termination of remodeling propagation rather than the influence of possible additional biophysical properties of the 3' filament end that could drive faster RAD-51 turnover in this locality. To this end, we monitored filament stability on 5' and 3' Cy3-labeled 23-mer oligo(dT) constructs (Figures 4H–4J). As previously reported, RFS-1/RIP-1 almost completely stabilizes the 5' end of this construct (Figure 4H) (Taylor et al., 2015). Notably, the same concentration (50 nM) of RFS-1/RIP-1 that was used in the above experiments on 43-mer constructs was also able to induce a striking stabilization at the 3' end of the 23-mer construct (Figure 4I). The magnitude of fluorescence reduction relative to RAD-51 alone was 41.9% ± 1.4% (Figure 4J), which is comparable to



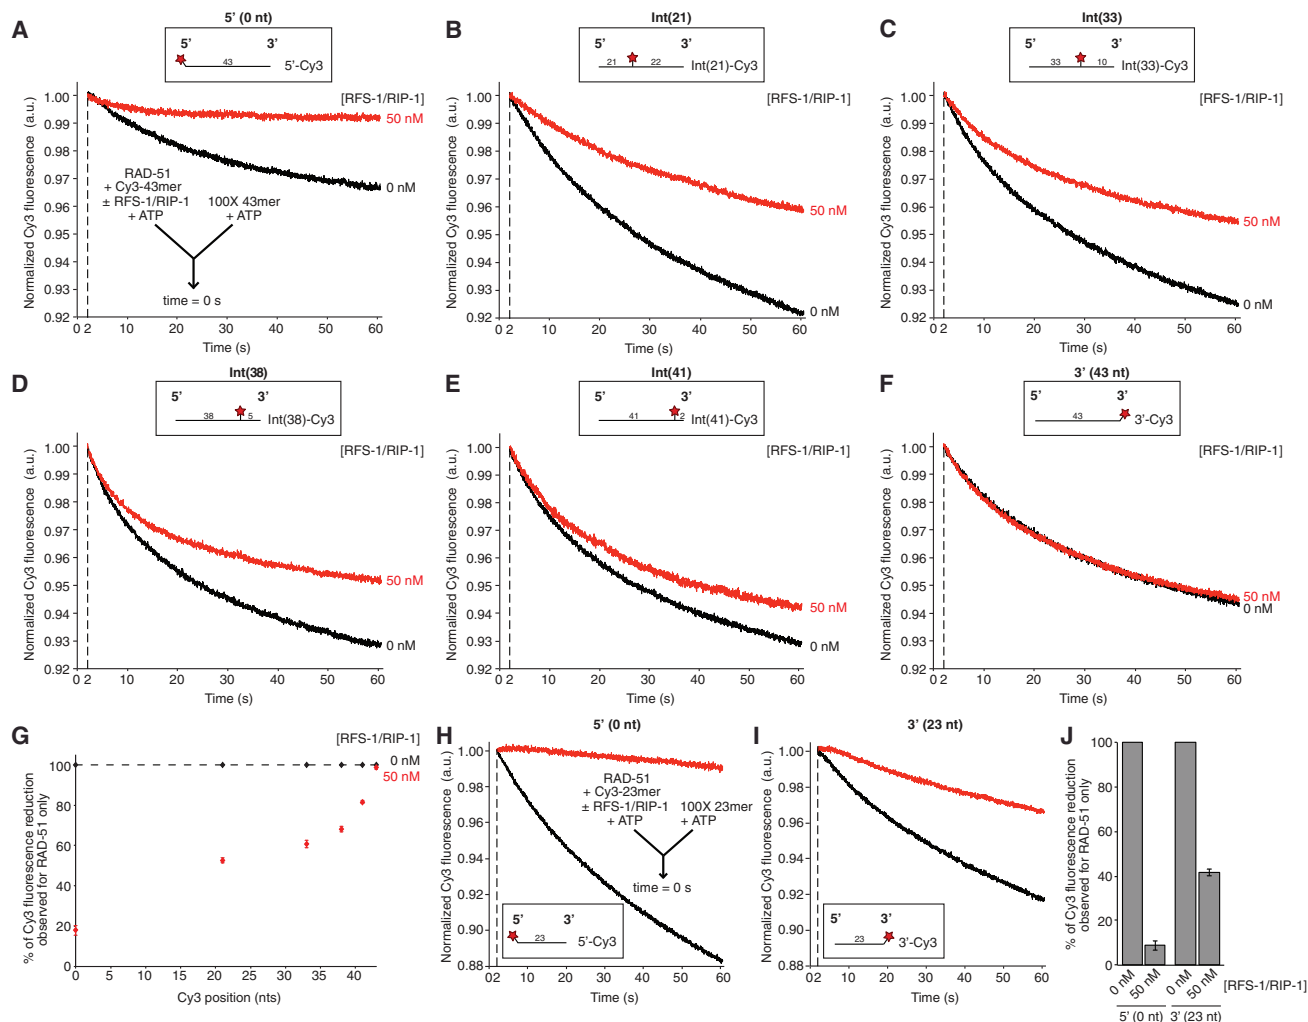

**Figure 4. RFS-1/RIP-1 Binding Propagates a Stabilizing Effect along RAD-51-ssDNA Filaments with 5' → 3' Polarity**

(A–F) Average normalized Cy3-43-mer fluorescence profiles plotted as a function of time. The RAD-51-ssDNA filaments pre-formed with 1  $\mu$ M RAD-51 + 15 nM Cy3-43-mer  $\pm$  50 nM RFS-1/RIP-1 for 10 min were mixed with 100-fold excess unlabeled 43-mer. The label position is indicated at the top center of each profile. The data were pooled from three independent experiments ( $n = 19$ –22). (A) 5'-Cy3 construct. (B) Int(21)-Cy3 construct. (C) Int(33)-Cy3 construct. (D) Int(38)-Cy3 construct. (E) Int(41)-Cy3 construct. (F) 3'-Cy3 construct.

(G) Graph of Cy3 position-dependence of  $\Delta$  Cy3 fluorescence in the presence of RFS-1/RIP-1 as a % of  $\Delta$  Cy3 fluorescence for RAD-51 only samples for the data presented in (A)–(F) (the error bars represent SEM).

(H and I) Average normalized Cy3-23-mer fluorescence profiles plotted as a function of time. The RAD-51-ssDNA filaments were pre-formed with 750 nM RAD-51 + 15 nM Cy3-23-mer  $\pm$  50 nM RFS-1/RIP-1 for 10 min, then mixed with 100-fold excess unlabeled 23-mer. The label position is indicated at the top center of each profile. The data were pooled from two independent experiments ( $n = 12$ –16). (H) 5'-Cy3 construct. (I) 3'-Cy3 construct.

(J) Graph of  $\Delta$  Cy3 fluorescence in the presence of RFS-1/RIP-1 as a % of  $\Delta$  Cy3 fluorescence for RAD-51 only samples for the data presented in (H) and (I) (the error bars represent SEM).

that observed on the Int(21)-Cy3 43-mer construct (Figures 3F, 3G, and 4G), which is labeled at a similar position downstream of the 5' end. Notably, this is in complete contrast to the effect observed at the 3' end of the 43-mer (Figures 3D–3G, S3F, S3N, 4F, and 4G). This result reinforces the above evidence that stabilization propagates approximately 40 nucleotides and is not antagonized by unique properties of the 3' filament end.

Together, these data demonstrate that RFS-1/RIP-1 binding at the 5' filament end is able to induce a conformational change in the filament beyond the locality of its binding site, which mani-

fest in DNaseI sensitization and stabilization against competitor DNA. The stopped-flow stability assays reveal in high resolution the magnitude and 5' → 3' polarity of the propagation of remodeling.

#### RFS-1/RIP-1 5' End Filament Binding Is Dependent on Nucleotide Binding, but Not Hydrolysis

RFS-1/RIP-1 contains ATP binding Walker motifs (Walker et al., 1982), and the Walker A and B boxes of RFS-1 are required for RAD-51-ssDNA filament remodeling and stimulation of strand

exchange activity (Taylor et al., 2015). We considered the possibility that a defect in ATP binding or hydrolysis underlies the failure of these mutants to mediate filament remodeling. To test this, we monitored the ability of wild-type RFS-1/RIP-1 pre-incubated with different concentrations of ATP to induce a fluorescence reduction in RAD-51 filaments pre-formed on 5' Cy3 labeled ssDNA in the presence of 2 mM ATP. Strikingly, we observed a strong concentration-dependent effect of ATP on the magnitude of fluorescence reduction, with no fluorescence reduction seen when RFS-1/RIP-1 was not pre-incubated with ATP (Figures 5A and 5B), suggesting RFS-1/RIP-1 must be nucleotide-bound to associate with RAD-51-ssDNA filaments.

The lack of response of RFS-1/RIP-1 not pre-incubated with ATP in this assay is surprising since RFS-1/RIP-1 encounters 1 mM ATP contributed from the RAD-51-ssDNA filament syringe upon mixing in stopped flow. In addition, the ATP concentration dependency of the filament response to RFS-1/RIP-1 occurs at relatively high ATP concentrations. To test if RFS-1/RIP-1 binds ATP weakly and slowly, we compared RAD-51 and RFS-1/RIP-1 binding to a fixed concentration of the fluorescent ATP analog TNP-ATP. RAD-51 has a high affinity for TNP-ATP ( $K_D \sim 3.5 \mu\text{M}$ ), whereas RFS-1/RIP-1 exhibited a weak response and failed to achieve saturation within the testable concentration range (Figures S4A and S4B). We also monitored RAD-51 and RFS-1/RIP-1 binding to 0.5  $\mu\text{M}$  MANT-ATP, an ATP analog that becomes fluorescent upon binding to protein, by stopped flow. Both proteins exhibited a concentration-dependent binding of MANT-ATP to the protein in the testable range (0–8  $\mu\text{M}$ ), and RAD-51 exhibited a much stronger MANT-ATP binding response than RFS-1/RIP-1 (Figure S4E). RAD-51 also binds MANT-ATP rapidly, causing a strong increase in fluorescence (Figure S4C), whereas RFS-1/RIP-1 binds much more slowly, causing a very small fluorescence response before the onset of MANT-ATP photobleaching (Figure S4D).

Together, these results indicate that RFS-1/RIP-1 has a low nucleotide affinity, which is in part due to a slow nucleotide binding rate ( $k_{on}$ ). Therefore, when RFS-1/RIP-1 mixes with 1 mM ATP from the RAD-51-ssDNA syringe (Figure 5A), its slow and weak ATP binding does not allow sufficient active complex to assemble within the 60 s timescale of the stopped-flow experiment to undergo detectable filament binding. We also validated that RFS-1/RIP-1 does not become inactivated by prolonged incubation in the absence of nucleotide, since the filament binding response is rescued by introducing ATP to the RFS-1/RIP-1 syringe after initial pre-incubation in the absence of nucleotide (Figures S4F and S4G).

To determine the nucleotide requirements of RFS-1/RIP-1 activity, we performed similar experiments in which RFS-1/RIP-1 was pre-incubated with ADP (Figures 5C and 5D), the product of ATP hydrolysis, or ATP $\gamma$ S (Figures 5E and 5F), a non-hydrolysable ATP analog. Both nucleotides induced an equivalent magnitude of fluorescence reduction in the stopped-flow assay compared to that observed in the presence of ATP ( $\Delta$  Cy3 fluorescence =  $-0.08$  to  $-0.09$ , 50 nM RFS-1/RIP-1) (Figures 5D and 5F), suggesting that RFS-1/RIP-1 requires nucleotide binding, but not hydrolysis for normal 5' filament end association.

Next, we wanted to test if RAD-51-ssDNA filaments remodeled by ADP- or ATP $\gamma$ S-bound RFS-1/RIP-1 become as efficiently

stabilized as those remodeled by ATP-bound RFS-1/RIP-1. To test this, we employed the ssDNA curtains system, which allows for multiple buffer exchanges. As before (Figure 1), RAD-51-ssDNA filaments were first assembled on ssDNA curtains in the presence of ATP, while RFS-1/RIP-1 was pre-incubated in buffer supplemented with ADP or ATP $\gamma$ S. After filament assembly, RAD-51 and ATP were removed and RFS-1/RIP-1 injected with ADP or ATP $\gamma$ S buffer and incubated for 10 min to bind filaments. Excess protein and nucleotide was washed away for 2 min with a buffer lacking nucleotide, before injecting RFS-1/RIP-1 and RPA in the same buffer to assess stability in the same way as in Figure 1. We observed RFS-1/RIP-1 incubated with either ADP (Figure 6B) or ATP $\gamma$ S (Figure 6C) are able to stabilize RAD-51 filaments as effectively as in the presence of ATP (Figures 6A and 6D).

Together, these results demonstrate that nucleotide binding is necessary and sufficient to activate the 5' filament end binding and remodeling activities of RFS-1/RIP-1, whereas nucleotide hydrolysis by the complex is dispensable for these functions. The Walker box mutants of RFS-1 also fail to induce a fluorescence reduction on pre-formed RAD-51-ssDNA filaments, which mimics the situation observed for nucleotide-free RFS-1/RIP-1 (Figures 5A and 5B). These data therefore suggest that the Walker box mutants of RFS-1 are likely to be defective for ATP binding, which could explain their overall failure to remodel RAD-51-ssDNA filaments (Taylor et al., 2015).

## DISCUSSION

### Mechanism of RAD51 Filament Remodeling by RAD51 Paralogs

Our previous work revealed a function for RAD51 paralogs in remodeling RAD51 pre-synaptic filaments to a relaxed and stable structure, which is more proficient for strand invasion (Taylor et al., 2015). Despite these insights, important mechanistic questions remained unresolved, particularly in relation to the precise nature of filament stabilization, how the RAD51 paralogs engage with the pre-synaptic filament, and the role of nucleotide co-factors in this process. We establish here that RAD51 paralogs act by capping the 5' end of the pre-synaptic filament in a nucleotide-dependent manner, which induces a conformational transition that propagates along the filament in a 5'  $\rightarrow$  3' direction. This extends up to 40 nucleotides away from the 5' end of the filament and shuts down the dissociation of RAD-51 from ssDNA (Figure 7A).

### Molecular Basis of RFS-1/RIP-1 Binding to the 5' Filament End

A major question arising from our work is how RFS-1/RIP-1 engages with the 5' filament end. Interestingly, modeling of the crystal structure of Psy3-Csm2 from the budding yeast *Shu* complex, which contains divergent RAD51 paralogs, revealed that it could be specifically docked onto the 5' end of the yeast RAD51 filament crystal structure (Conway et al., 2004; Sasanuma et al., 2013). In contrast, docking to the 3' end was associated with steric clashes rendering such an association less plausible (Sasanuma et al., 2013). Our study provides experimental evidence that RAD51 paralogs recognize an intrinsic

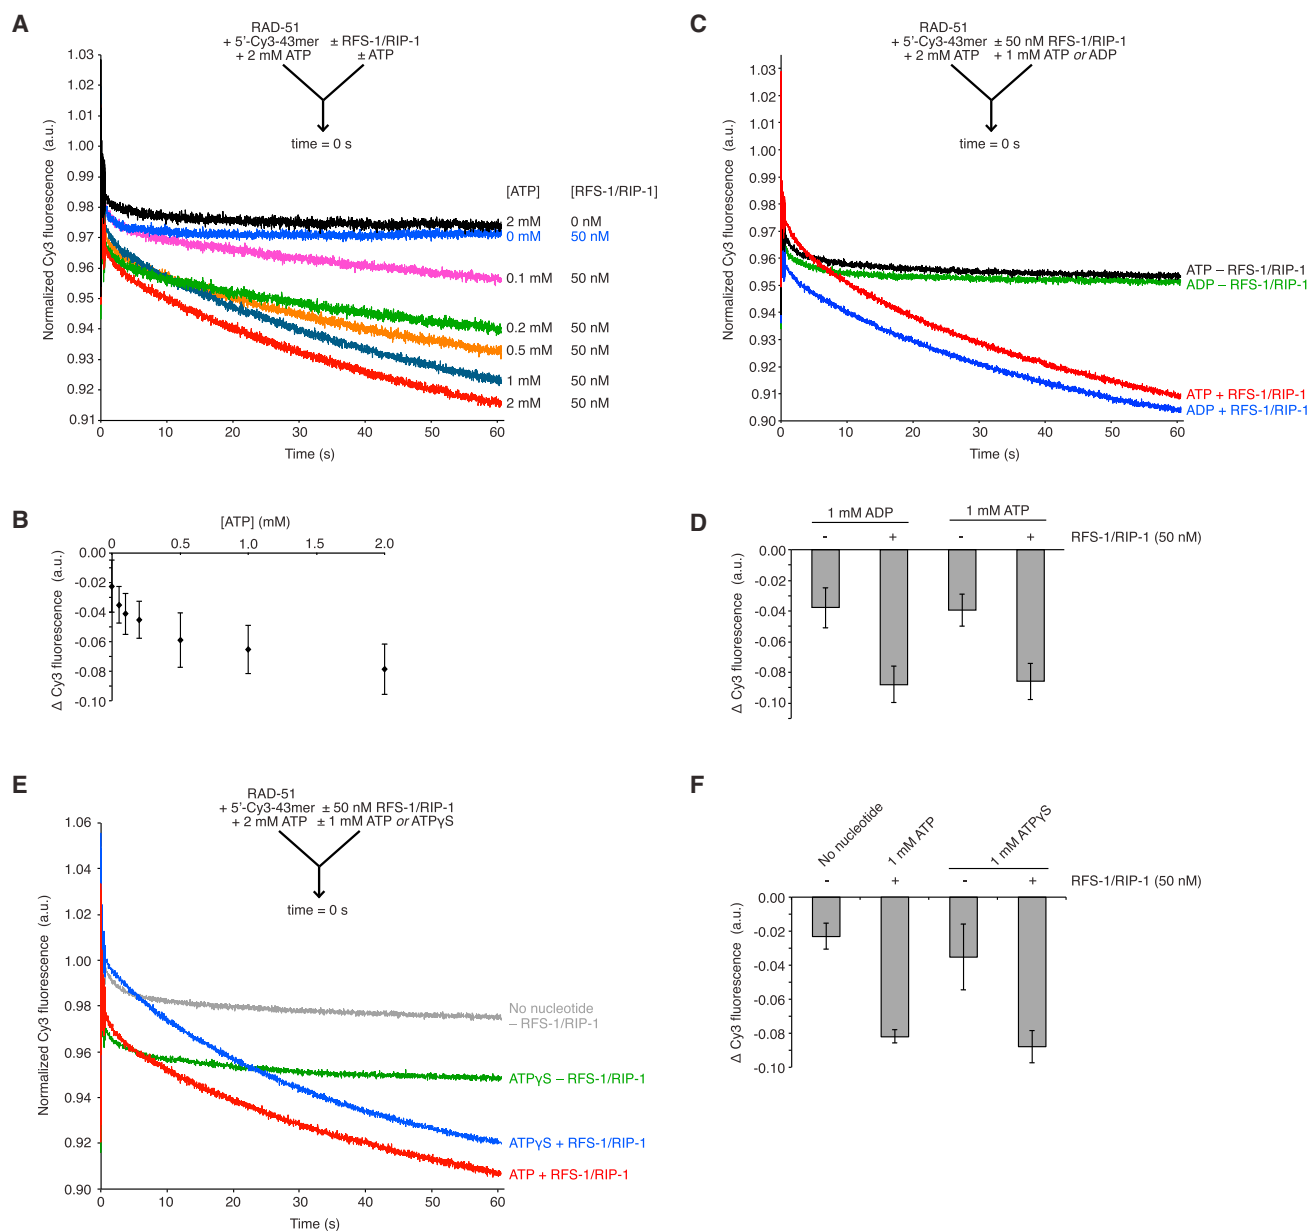

**Figure 5. Binding of RAD-51-ssDNA Filaments Requires ATP Binding, but Not Hydrolysis by RFS-1/RIP-1**

(A) Average normalized Cy3-43-mer fluorescence profiles plotted as a function of time. The arrow indicates the components of the two syringes rapidly mixed at the 0 s time point in a stopped-flow instrument. The RAD-51-ssDNA filaments pre-formed with 1  $\mu$ M RAD-51 + 15 nM Cy3-43-mer for 10 min were mixed with buffer with the indicated concentration of ATP  $\pm$  50 nM RFS-1/RIP-1 ( $n = 7-9$ ).

(B) Graph of ATP-dependence of  $\Delta$  Cy3 fluorescence in the presence of RFS-1/RIP-1 for the data presented in (A) (the error bars represent SD).

(C) Average normalized Cy3-43-mer fluorescence profiles plotted as a function of time. The RAD-51-ssDNA filaments pre-formed with 1  $\mu$ M RAD-51 + 15 nM Cy3-43-mer for 10 min were mixed with buffer with the indicated nucleotide  $\pm$  50 nM RFS-1/RIP-1 ( $n = 8-9$ ).

(D) Graph of average  $\Delta$  Cy3 fluorescence for the data presented in (C) (the error bars represent SD).

(E) Average normalized Cy3-43-mer fluorescence profiles plotted as a function of time. The RAD-51-ssDNA filaments pre-formed with 1  $\mu$ M RAD-51 + 15 nM Cy3-43-mer for 10 min were mixed with buffer with the indicated nucleotide  $\pm$  50 nM RFS-1/RIP-1 ( $n = 4-8$ ).

(F) Graph of average  $\Delta$  Cy3 fluorescence for the data presented in (E) (the error bars represent SD).

See also Figure S4.

polarity within the RAD51 filament and bind specifically to the 5' end. Given that RFS-1 mutants that abolish the ability of RFS-1/RIP-1 to drive the fluorescence reduction associated with 5'

filament end binding also fail to mediate remodeling and stabilization (Taylor et al., 2015), we propose that normal 5' filament end binding is a pre-requisite for initiation of remodeling.

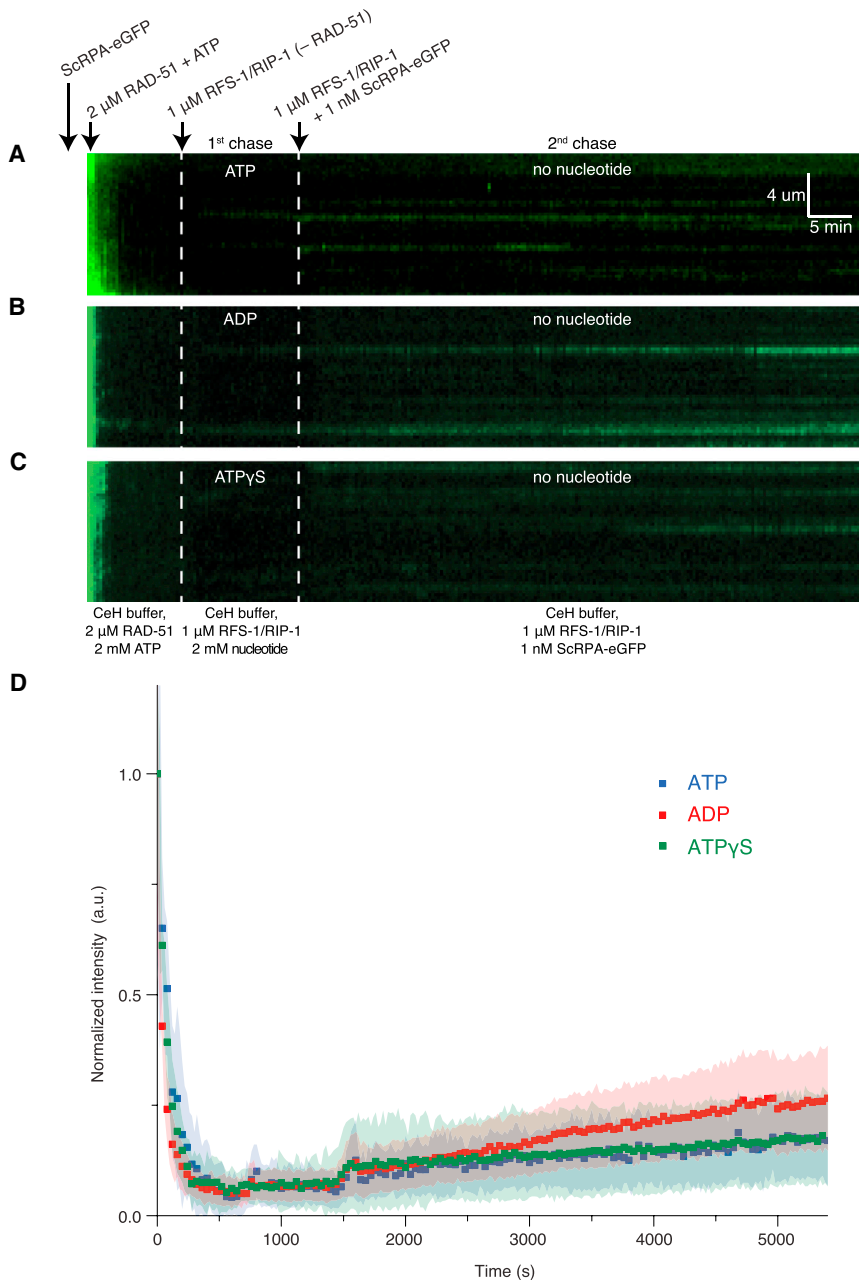

**Figure 6. Nucleotide Hydrolysis by RFS-1/RIP-1 Is Dispensable for RAD-51-ssDNA Filament Stabilization**

(A–C) Kymographs showing the rapid exchange of ScRPA-eGFP by 2  $\mu$ M RAD-51 in the presence of 2 mM ATP and the subsequent stabilization on the RAD-51 filament by the RFS-1/RIP-1 complex when it is pre-incubated for 10 min with 2 mM ATP (A), ADP (B), or ATP $\gamma$ S (C). Free RAD-51 and ATP were washed out of the flow cell before the injection of RFS-1/RIP-1, which is pre-incubated with the indicated nucleotide before injection. The RIP-1/RFS-1 is incubated with RAD-51 filaments in the flow cell for 10 min before free nucleotide was washed away and more RIP-1/RFS-1 is flown in with buffer containing 1 nM ScRPA-eGFP. The buffer conditions inside the flow cell during the incubations are indicated below the kymographs. ScRPA-eGFP binding serves as a proxy for RAD51 dissociation.

(D) Quantitation of the intensity of the ScRPA-eGFP signal over the time course of the experiment for the data in (A)–(C). Data with ATP (blue trace) is reproduced from Figure 1G for comparison purposes to the other nucleotide analogs.

that observed in the RecA-ssDNA crystal structure (Chen et al., 2008). Csm2-Psy3 may be a good model for RFS-1/RIP-1 since Psy3, like RIP-1, only contains a Walker B box (Martín et al., 2006), while Csm2, despite lacking sequence homology with RAD51, adopts a RAD51-like fold (Sasanuma et al., 2013; She et al., 2012; Tao et al., 2012). Accordingly, Csm2 is proposed to dock directly to the 5' filament end, while Psy3 is distal (Sasanuma et al., 2013), consistent with the fact that RFS-1, but not RIP-1, interacts with RAD-51 in yeast two hybrid (Taylor et al., 2015). In addition, recent work identified a homolog of the SWIM domain-containing protein of the Shu complex (yeast Shu2 or human SWS1) (Liu et al., 2011; Martín et al., 2006) in *C. elegans*, SWS-1 (Godin et al., 2015; McClendon et al.,

2016). SWS-1 interacts with RIP-1, but not RFS-1, in a manner dependent on the RIP-1 Walker B box aspartic acid residue 131 (McClendon et al., 2016). Notably, the same D131A mutation in RIP-1 does not dramatically interfere with the RFS-1/RIP-1 interaction in yeast two hybrid (Taylor et al., 2015), consistent with this residue exhibiting greater functional importance in maintaining a RIP-1/SWS-1 interface. SAXS data also indicate that Shu2 associates with Psy3 rather than Csm2 (She et al., 2012) and, by deduction, distal to the 5' filament end. Together, these observations support a model in which RFS-1 directly contacts RAD-51 at the 5' filament end and RIP-1 is positioned distally, allowing it to interact with SWS-1 (Figures 7B and 7C). How SWS-1 influences filament binding and remodeling remains to be tested.

In the future, it will be important to establish tractable methods to obtain atomic resolution structural models of RAD51 paralogs bound to RAD51 filaments, to better understand the intricacies underlying filament capping and remodeling. Docking of the yeast Csm2-Psy3 heterodimer and Rad51-ssDNA filament crystal structures was achieved by modeling the complex as a direct extension of the filament (Sasanuma et al., 2013), consistent with the fact that the fundamental repetitive units of the yeast Rad51 filament are Rad51 homodimers, which assemble in tandem with a distinctive interface to that between the two monomers of each homodimer pair (Conway et al., 2004). Both protomer-protomer interfaces involve the ATP binding pockets of adjacent protomers and bound ATP co-factor (Conway et al., 2004), similar to

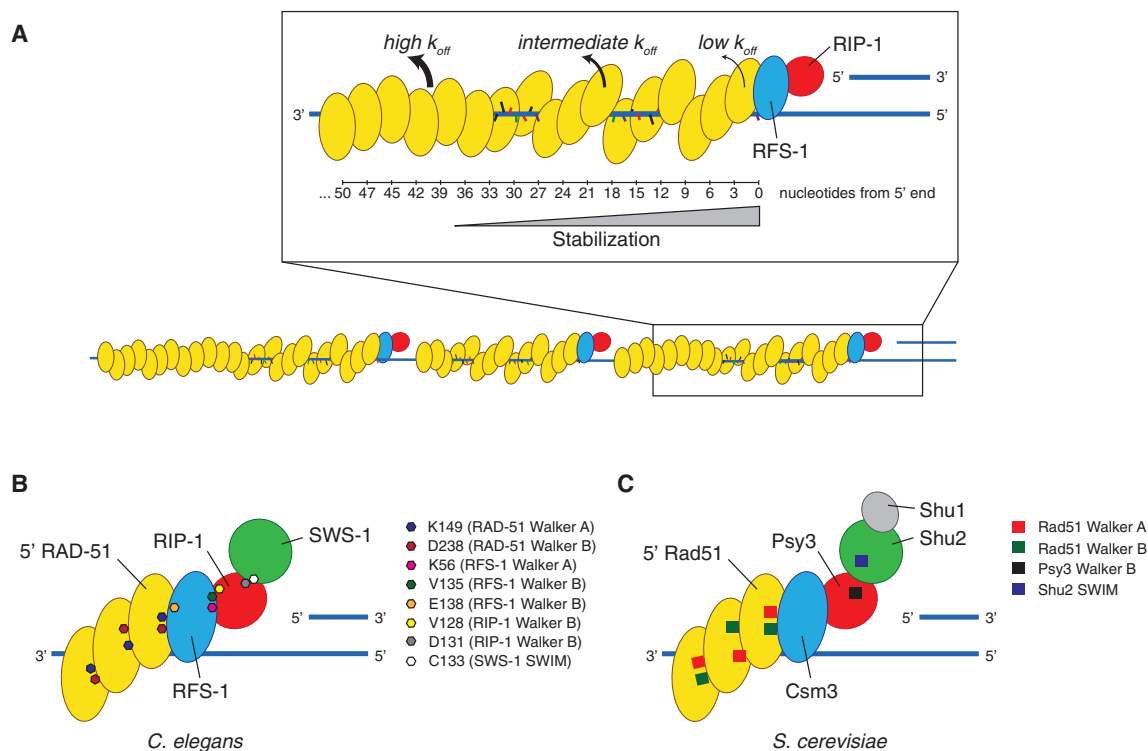

**Figure 7. Model for the Proposed Mechanism of RAD51-ssDNA Filament Remodeling by RAD51 Paralogs**

(A) RFS-1/RIP-1 binds the 5' end of individual RAD-51-ssDNA filaments and propagates a stabilizing effect with 5' → 3' polarity up to 40 nucleotides from the 5' end. In the context of a larger pre-synaptic complex, such as in ssDNA curtain experiments, RFS-1/RIP-1 may cap RAD-51-ssDNA filaments arising from separate nucleation events to allow stabilization of the entire assembly.

(B and C) Putative model for the interaction network between RAD51, RAD51 paralogs, and Shu complex proteins from *C. elegans* (B) and *S. cerevisiae* (C) in the context of the RAD51-ssDNA filament 5' end. Hypothetical positions of critical residues for these interactions from the Walker boxes and SWIM domain of *C. elegans* RAD-51, RFS-1, RIP-1, and SWS-1 are indicated. The equivalent protein features identified in the *S. cerevisiae* proteins are also noted.

Another key question is how do nucleotide co-factors contribute to 5' filament end recognition? Since the RFS-1/RAD-51 interaction is highly sensitive to mutations in their Walker boxes (Taylor et al., 2015) and RFS-1/RIP-1 must be nucleotide-bound to mediate normal 5' filament end binding, a nucleotide co-factor may sit at the proposed RAD-51/RFS-1 interaction interface, but nucleotide binding may also be required between RFS-1 and RIP-1 to allow them to adopt an active form. RFS-1/RIP-1 bound to ADP was equally efficient as ATP in 5' filament end binding, raising the question of exactly which nucleotide binds each of these proposed interfaces physiologically.

EM experiments on circular ssDNA revealed filament binding is independent of a 5' DNA end. This is supported by the fact filament binding by RFS-1/RIP-1 is detectable in stopped flow even when the native 5' DNA end is modified by the Cy3 dye. Notably, RFS-1/RIP-1 also readily stabilizes the RAD-51 filaments in the ssDNA curtain assays, even though the long ssDNA molecules have no accessible 5' ends. In these assays, it is likely that RFS-1/RIP-1 binds to the 5' filament termini located between filament discontinuities (Figure 7A). RFS-1/RIP-1 may still contact the ssDNA backbone during filament capping. In EMSA, RFS-1/RIP-1 binds ssDNA very weakly, but strongly enriches equilibrium protein-ssDNA complex levels in the presence of RAD-51 (Taylor et al., 2015). Thus, RFS-1/RIP-1 could

contact ssDNA with higher affinity in the context of a pre-established RAD-51 filament. Both RAD-51 and ssDNA contacts by RFS-1/RIP-1 could therefore be required for its filament capping activity.

### Interplay between HR Regulators in Pre-synaptic Complex Regulation

In contrast to Psy2-Csm3, the crystal structure of a fragment of human BRCA2 fused to RAD51 can be modeled as binding the 3' end of the yeast Rad51 filament (Pellegrini et al., 2002; Sasana et al., 2013). This is consistent with electron microscopy studies demonstrating 3' filament end binding of full-length BRCA2, suggesting BRCA2 promotes filament growth with 3' → 5' polarity, at least on naked ssDNA (Shahid et al., 2014). Our data on spontaneous assembly of RAD-51 filaments are consistent with unidirectional filament extension in the 5' → 3' direction, as has also been interpreted for yeast Rad51 (Antony et al., 2009; Hwang and Myong, 2014; Qiu et al., 2013) or bidirectional assembly occurring more rapidly 3' → 5' than 5' → 3'. BRCA2 may restrict filament extension polarity to 3' → 5', which importantly would leave the 5' end of the extending filament free for binding by RAD51 paralogs.

Given the distinct filament binding polarity exhibited by BRCA2 and RFS-1/RIP-1, it will be interesting to analyze the

interplay between the nematode BRCA2 ortholog, BRC-2, and RFS-1/RIP-1 during filament assembly and remodeling, since these proteins may synergize in these processes on naked and/or RPA-bound ssDNA. Indeed, it was recently shown that although the yeast RAD51 paralog complex Rad55-Rad57 and the Shu complex do not stimulate Rad51 binding to RPA-coated ssDNA, they significantly synergize with Rad52 in this process (Gaines et al., 2015). We have also observed that RFS-1/RIP-1 stimulates filament formation in the presence of ATP (Taylor et al., 2015), so it is possible this activity may synergize with BRC-2. In addition, by capping opposing ends of filaments, BRC-2 and RFS-1/RIP-1 may even exhibit a degree of allostery in mediating filament remodeling and stability. In the case of the  $\beta$ 2-adrenergic and  $\mu$ -opioid G protein coupled receptors, binding of agonists is not sufficient to drive the complete establishment of the active conformation of the receptor and full activation requires heterotrimeric G protein engagement (Manglik et al., 2015; Sounier et al., 2015). As such, anchoring of the 3' filament end by BRC-2 could co-operatively enhance filament remodeling by RFS-1/RIP-1 to allow propagation beyond the 40 nucleotide threshold defined in this study.

### Propagation of RAD51 Filament Remodeling and Stabilization

Another critical structural question is exactly how RFS-1/RIP-1 propagates a biophysical change along the filament to a point considerably distal to its binding site, manifested as stabilization and nuclease-sensitization of the filament beyond the region in immediate proximity to the 5' filament end where RFS-1/RIP-1 binds. One possible mechanism is that the binding of RFS-1/RIP-1 induces a conformational change in the proximal RAD-51 protomer in the filament. This in turn could modulate the interface between this RAD-51 molecule and an adjacent, distal RAD-51 protomer, ultimately propagating remodeling with 5'  $\rightarrow$  3' polarity through allosteric communication between adjacent RAD-51 monomers within the filament, up to 40 nucleotides (13–14 RAD-51 protomers) from the end. Such long-range conformational propagation in response to a binding event by proteins and/or small molecule ligands is well established for signal transduction by membrane receptors, such as G protein coupled receptors upon agonist and heterotrimeric G protein binding (Manglik et al., 2015; Sounier et al., 2015). It is therefore conceivable that long ranging organizational changes could occur throughout RAD51 filaments in response to terminal binding events by RAD51 paralogs.

In conclusion, our study provides insights into the molecular mechanism of RAD51-ssDNA filament remodeling by RAD51 paralogs, paving the way for future structural studies of this process, and interplay with other HR mediators.

### EXPERIMENTAL PROCEDURES

All experiments were performed at 25°C. For stopped-flow experiments, equal volumes of the indicated components were rapidly mixed and Cy3 fluorescence monitored for 1 min. Raw data sets were normalized as follows: for RAD-51 ssDNA binding (Figure S1) and RFS-1/RIP-1 filament binding experiments (Figures 2 and 5), normalized to the starting value for Cy3 fluorescence; for competition experiments (Figures 3, 4, and S3), normalized to the value for Cy3 fluorescence at the 2.01998 s time point and truncated before this. ssDNA curtains were prepared by rolling circle amplification of an M13mp18 single-strand

plasmid, tethered at both ends in a flow cell, and visualized by binding of ScRPA-eGFP. RAD-51 filaments were assembled by flushing out ScRPA-eGFP and flowing in RAD-51 in the presence of ATP. Filaments were equilibrated with buffer containing the indicated nucleotide before incubation with RFS-1/RIP-1. To assess filament stability, RAD-51 was removed and replaced with ScRPA-eGFP in the absence of ATP, while maintaining RFS-1/RIP-1 in the buffer. For quantification, the fluorescence intensity of individual kymographs was adjusted to the background and normalized to the starting value. Immuno-gold EM was performed by incubating proteins (1  $\mu$ M RAD-51 and 0.1  $\mu$ M RFS-1/RIP-1) and circular p8064 ssDNA or linearized PhiX ssDNA, then incubating with anti-FLAG antibody conjugated to 20-nm gold particles, staining with uranyl acetate, and imaging. For nuclease protection assays, protein-DNA complexes were assembled on 5' or 3' fluorescently labeled 61-mer ssDNA before challenging with DNaseI, deproteinizing, and resolving DNA products by PAGE. See also Supplemental Experimental Procedures online.

### SUPPLEMENTAL INFORMATION

Supplemental Information includes Supplemental Experimental Procedures and four figures and can be found with this article online at <http://dx.doi.org/10.1016/j.molcel.2016.10.020>.

### AUTHOR CONTRIBUTIONS

M.R.G.T., M.S., L.K., and S.J.B. conceived the study. M.R.G.T. purified proteins. M.R.G.T. and M.S. performed stopped-flow, EMSA, and nuclease protection assays. M.S. performed nucleotide binding analyses. C.J.M. and E.C.G. performed ssDNA curtains experiments. R.C., M.R.G.T., and L.M.C. performed EM. T.T. and M.R.G.T. analyzed EM data. M.R.G.T. and S.J.B. wrote the manuscript.

### ACKNOWLEDGMENTS

We thank A. Alidoust and N. Patel for yeast fermentation. M.R.G.T. is supported by a Sir Henry Wellcome Postdoctoral Fellowship from the Wellcome Trust (110014/Z/15/Z). The S.J.B. laboratory is supported by the Francis Crick Institute, which receives its core funding from Cancer Research UK (FC0010048), the UK Medical Research Council (FC0010048), the Wellcome Trust (FC0010048), a European Research Council (ERC) Advanced Investigator grant (RecMitMei), and a Wellcome Trust Senior Investigator grant. The L.K. laboratory is supported by the Czech Science Foundation (GA13-26629S and GAP207/12/2323), the National Program of Sustainability II (MEYS CR, project no. LQ1605), the project FNUSA-ICRC no. CZ.1.05/1.1.00/02.0123 (OP VaVpl), and by project ICRC-ERA-HumanBridge (no. 316345) funded by the European Commission. The E.C.G. laboratory is funded by a grant from the NIH (1R35GM118026).

Received: July 5, 2016

Revised: September 9, 2016

Accepted: October 14, 2016

Published: November 17, 2016

### REFERENCES

- Antony, E., Tomko, E.J., Xiao, Q., Krejci, L., Lohman, T.M., and Ellenberger, T. (2009). Srs2 disassembles Rad51 filaments by a protein-protein interaction triggering ATP turnover and dissociation of Rad51 from DNA. *Mol. Cell* 35, 105–115.
- Chapman, J.R., Taylor, M.R.G., and Boulton, S.J. (2012). Playing the end game: DNA double-strand break repair pathway choice. *Mol. Cell* 47, 497–510.
- Chen, Z., Yang, H., and Pavletich, N.P. (2008). Mechanism of homologous recombination from the RecA-ssDNA/dsDNA structures. *Nature* 453, 489–494.
- Chun, J., Buechelmaier, E.S., and Powell, S.N. (2013). Rad51 paralog complexes BCDX2 and CX3 act at different stages in the BRCA1-BRCA2-dependent homologous recombination pathway. *Mol. Cell. Biol.* 33, 387–395.

- Conway, A.B., Lynch, T.W., Zhang, Y., Fortin, G.S., Fung, C.W., Symington, L.S., and Rice, P.A. (2004). Crystal structure of a Rad51 filament. *Nat. Struct. Mol. Biol.* *11*, 791–796.
- French, C.A., Masson, J.-Y., Griffin, C.S., O'Regan, P., West, S.C., and Thacker, J. (2002). Role of mammalian RAD51L2 (RAD51C) in recombination and genetic stability. *J. Biol. Chem.* *277*, 19322–19330.
- Gaines, W.A., Godin, S.K., Kabinavar, F.F., Rao, T., VanDemark, A.P., Sung, P., and Bernstein, K.A. (2015). Promotion of presynaptic filament assembly by the ensemble of *S. cerevisiae* Rad51 paralogues with Rad52. *Nat. Commun.* *6*, 7834.
- Genois, M.M., Plourde, M., Éthier, C., Roy, G., Poirier, G.G., Ouellette, M., and Masson, J.Y. (2015). Roles of Rad51 paralogs for promoting homologous recombination in *Leishmania infantum*. *Nucleic Acids Res.* *43*, 2701–2715.
- Gibb, B., Ye, L.F., Gergoudis, S.C., Kwon, Y., Niu, H., Sung, P., and Greene, E.C. (2014a). Concentration-dependent exchange of replication protein A on single-stranded DNA revealed by single-molecule imaging. *PLoS ONE* *9*, e87922.
- Gibb, B., Ye, L.F., Kwon, Y., Niu, H., Sung, P., and Greene, E.C. (2014b). Protein dynamics during presynaptic-complex assembly on individual single-stranded DNA molecules. *Nat. Struct. Mol. Biol.* *21*, 893–900.
- Godin, S.K., Meslin, C., Kabinavar, F., Bratton-Palmer, D.S., Hornack, C., Mihalevic, M.J., Yoshida, K., Sullivan, M., Clark, N.L., and Bernstein, K.A. (2015). Evolutionary and functional analysis of the invariant SWIM domain in the conserved Shu2/SWS1 protein family from *Saccharomyces cerevisiae* to *Homo sapiens*. *Genetics* *199*, 1023–1033.
- Herrera, J.E., and Chaires, J.B. (1994). Characterization of preferred deoxyribonuclease I cleavage sites. *J. Mol. Biol.* *236*, 405–411.
- Hwang, H., and Myong, S. (2014). Protein induced fluorescence enhancement (PIFE) for probing protein-nucleic acid interactions. *Chem. Soc. Rev.* *43*, 1221–1229.
- Hwang, H., Kim, H., and Myong, S. (2011). Protein induced fluorescence enhancement as a single molecule assay with short distance sensitivity. *Proc. Natl. Acad. Sci. USA* *108*, 7414–7418.
- Jensen, R.B., Carreira, A., and Kowalczykowski, S.C. (2010). Purified human BRCA2 stimulates RAD51-mediated recombination. *Nature* *467*, 678–683.
- Johnson, R.D., and Jasin, M. (2001). Double-strand-break-induced homologous recombination in mammalian cells. *Biochem. Soc. Trans.* *29*, 196–201.
- Johnson, R.D., Liu, N., and Jasin, M. (1999). Mammalian XRCC2 promotes the repair of DNA double-strand breaks by homologous recombination. *Nature* *401*, 397–399.
- Krejci, L., Altmannova, V., Spirek, M., and Zhao, X. (2012). Homologous recombination and its regulation. *Nucleic Acids Res.* *40*, 5795–5818.
- Liu, J., Doty, T., Gibson, B., and Heyer, W.-D. (2010). Human BRCA2 protein promotes RAD51 filament formation on RPA-covered single-stranded DNA. *Nat. Struct. Mol. Biol.* *17*, 1260–1262.
- Liu, T., Wan, L., Wu, Y., Chen, J., and Huang, J. (2011). hSWS1·SWSAP1 is an evolutionarily conserved complex required for efficient homologous recombination repair. *J. Biol. Chem.* *286*, 41758–41766.
- Manglik, A., Kim, T.H., Masureel, M., Altenbach, C., Yang, Z., Hilger, D., Lerch, M.T., Kobilka, T.S., Thian, F.S., Hubbell, W.L., et al. (2015). Structural insights into the dynamic process of  $\beta_2$ -adrenergic receptor signaling. *Cell* *161*, 1101–1111.
- Martín, V., Chahwan, C., Gao, H., Blais, V., Wohlschlegel, J., Yates, J.R., 3rd, McGowan, C.H., and Russell, P. (2006). Sws1 is a conserved regulator of homologous recombination in eukaryotic cells. *EMBO J.* *25*, 2564–2574.
- McClendon, T.B., Sullivan, M.R., Bernstein, K.A., and Yanowitz, J.L. (2016). Promotion of homologous recombination by SWS-1 in complex with RAD-51 paralogs in *Caenorhabditis elegans*. *Genetics* *203*, 133–145.
- Pellegrini, L., Yu, D.S., Lo, T., Anand, S., Lee, M., Blundell, T.L., and Venkitaraman, A.R. (2002). Insights into DNA recombination from the structure of a RAD51-BRCA2 complex. *Nature* *420*, 287–293.
- Pierce, A.J., Johnson, R.D., Thompson, L.H., and Jasin, M. (1999). XRCC3 promotes homology-directed repair of DNA damage in mammalian cells. *Genes Dev.* *13*, 2633–2638.
- Qi, Z., Redding, S., Lee, J.Y., Gibb, B., Kwon, Y., Niu, H., Gaines, W.A., Sung, P., and Greene, E.C. (2015). DNA sequence alignment by microhomology sampling during homologous recombination. *Cell* *160*, 856–869.
- Qiu, Y., Antony, E., Doganay, S., Koh, H.R., Lohman, T.M., and Myong, S. (2013). Srs2 prevents Rad51 filament formation by repetitive motion on DNA. *Nat. Commun.* *4*, 2281.
- Rattray, A.J., and Symington, L.S. (1995). Multiple pathways for homologous recombination in *Saccharomyces cerevisiae*. *Genetics* *139*, 45–56.
- San Filippo, J., Sung, P., and Klein, H. (2008). Mechanism of eukaryotic homologous recombination. *Annu. Rev. Biochem.* *77*, 229–257.
- Sasanuma, H., Tawaramoto, M.S., Lao, J.P., Hosaka, H., Sanda, E., Suzuki, M., Yamashita, E., Hunter, N., Shinohara, M., Nakagawa, A., and Shinohara, A. (2013). A new protein complex promoting the assembly of Rad51 filaments. *Nat. Commun.* *4*, 1676.
- Shahid, T., Soroka, J., Kong, E.H., Malivert, L., Mcllwraith, M.J., Pape, T., West, S.C., and Zhang, X. (2014). Structure and mechanism of action of the BRCA2 breast cancer tumor suppressor. *Nat. Struct. Mol. Biol.* *21*, 962–968.
- She, Z., Gao, Z.Q., Liu, Y., Wang, W.J., Liu, G.F., Shtykova, E.V., Xu, J.H., and Dong, Y.H. (2012). Structural and SAXS analysis of the budding yeast SHU-complex proteins. *FEBS Lett.* *586*, 2306–2312.
- Sigurdsson, S., Van Komen, S., Bussen, W., Schild, D., Albala, J.S., and Sung, P. (2001). Mediator function of the human Rad51B-Rad51C complex in Rad51/RPA-catalyzed DNA strand exchange. *Genes Dev.* *15*, 3308–3318.
- Solinger, J.A., Kianitsa, K., and Heyer, W.D. (2002). Rad54, a Swi2/Snf2-like recombinational repair protein, disassembles Rad51:dsDNA filaments. *Mol. Cell* *10*, 1175–1188.
- Sounier, R., Mas, C., Steyaert, J., Laeremans, T., Manglik, A., Huang, W., Kobilka, B.K., Déméné, H., and Granier, S. (2015). Propagation of conformational changes during  $\mu$ -opioid receptor activation. *Nature* *524*, 375–378.
- Stennett, E.M., Ciuba, M.A., Lin, S., and Levitus, M. (2015). Demystifying PIFE: The photophysics behind the protein-induced fluorescence enhancement phenomenon in Cy3. *J. Phys. Chem. Lett.* *6*, 1819–1823.
- Sung, P. (1997). Yeast Rad55 and Rad57 proteins form a heterodimer that functions with replication protein A to promote DNA strand exchange by Rad51 recombinase. *Genes Dev.* *11*, 1111–1121.
- Takata, M., Sasaki, M.S., Tachiiri, S., Fukushima, T., Sonoda, E., Schild, D., Thompson, L.H., and Takeda, S. (2001). Chromosome instability and defective recombinational repair in knockout mutants of the five Rad51 paralogs. *Mol. Cell Biol.* *21*, 2858–2866.
- Tao, Y., Li, X., Liu, Y., Ruan, J., Qi, S., Niu, L., and Teng, M. (2012). Structural analysis of Shu proteins reveals a DNA binding role essential for resisting damage. *J. Biol. Chem.* *287*, 20231–20239.
- Taylor, M.R., Špirek, M., Chaurasiya, K.R., Ward, J.D., Carzaniga, R., Yu, X., Egelman, E.H., Collinson, L.M., Rueda, D., Krejci, L., and Boulton, S.J. (2015). Rad51 paralogs remodel pre-synaptic Rad51 filaments to stimulate homologous recombination. *Cell* *162*, 271–286.
- Thorslund, T., Mcllwraith, M.J., Compton, S.A., Lekomtsev, S., Petronczki, M., Griffith, J.D., and West, S.C. (2010). The breast cancer tumor suppressor BRCA2 promotes the specific targeting of RAD51 to single-stranded DNA. *Nat. Struct. Mol. Biol.* *17*, 1263–1265.
- Walker, J.E., Saraste, M., Runswick, M.J., and Gay, N.J. (1982). Distantly related sequences in the alpha- and beta-subunits of ATP synthase, myosin, kinases and other ATP-requiring enzymes and a common nucleotide binding fold. *EMBO J.* *1*, 945–951.
- Ward, J.D., Barber, L.J., Petalcorin, M.I., Yanowitz, J., and Boulton, S.J. (2007). Replication blocking lesions present a unique substrate for homologous recombination. *EMBO J.* *26*, 3384–3396.
- Wold, M.S. (1997). Replication protein A: a heterotrimeric, single-stranded DNA-binding protein required for eukaryotic DNA metabolism. *Annu. Rev. Biochem.* *66*, 61–92.
- Yu, X., Jacobs, S.A., West, S.C., Ogawa, T., and Egelman, E.H. (2001). Domain structure and dynamics in the helical filaments formed by RecA and Rad51 on DNA. *Proc. Natl. Acad. Sci. USA* *98*, 8419–8424.

**Molecular Cell, Volume 64**

**Supplemental Information**

**A Polar and Nucleotide-Dependent  
Mechanism of Action for RAD51 Paralogs  
in RAD51 Filament Remodeling**

**Martin R.G. Taylor, Mário Špírek, Chu Jian Ma, Raffaella Carzaniga, Tohru Takaki, Lucy M. Collinson, Eric C. Greene, Lumir Krejci, and Simon J. Boulton**



## **Supplemental Information: Taylor *et al***

### **Content:**

**Supplemental Figures 1-4.**

**Supplemental Experimental Procedures.**

**Supplemental References.**

**Figure S1**

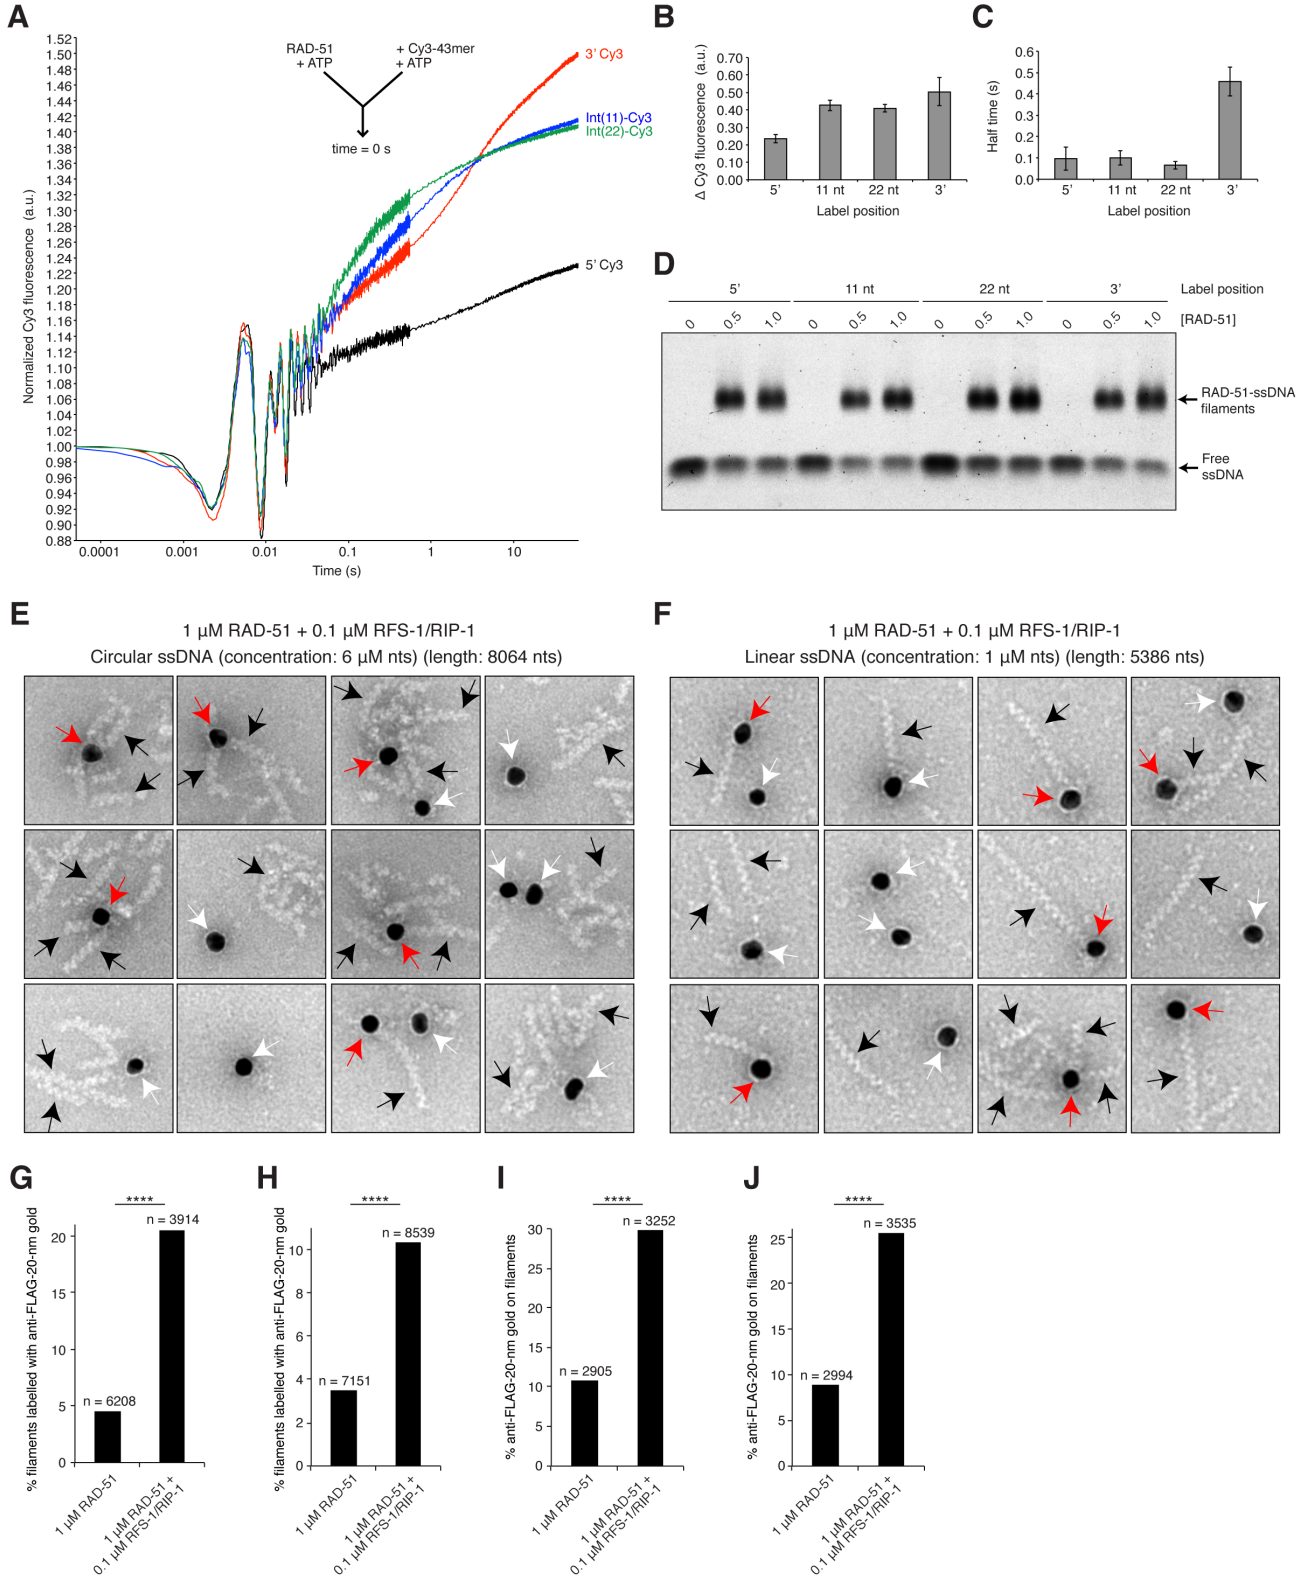

**Figure S1: RAD-51 filament assembly on different oligonucleotides and RFS-1/RIP-1 binding to RAD-51-ssDNA filaments formed on circular ssDNA. Related to Figure 2.**

(A) Average normalized Cy3-43mer fluorescence profiles plotted as a function of time. The arrow indicates the components of the two syringes rapidly mixed at the 0 s time point in a stopped-flow instrument. 1  $\mu$ M RAD-51 pre-incubated with ATP was mixed with 15 nM Cy3-43mer. 5'-, Int(11)-, Int(22)- and 3'-Cy3 constructs were analysed (n = 9).

(B) Graph of average  $\Delta$  Cy3 fluorescence for the data presented in A (errors: s.d.).

(C) Graph of average half-time for the fluorescence change for the data presented in A (errors: s.d.).

(D) Protein-DNA complexes formed by RAD-51 on the 5'-, Int(11)-, Int(22)- and 3'-Cy3-43mer constructs with ATP resolved in native agarose gels.

(E and F) Example images of anti-FLAG-20-nm gold particles bound (red arrows) or unbound (white arrows) to RAD-51-ssDNA filaments (black arrows) formed in the presence of RFS-1/RIP-1 on either (E) circular p8064 ssDNA or (F) linearized PhiX ssDNA.

(G-H) Quantification of % RAD-51-ssDNA filaments (including aggregated filaments) formed on circular ssDNA labelled with anti-FLAG-20-nm gold particles  $\pm$  RFS-1/RIP-1 from two independent experiments. \*\*\*\* Two-tailed Chi-square test of independence,  $p < 0.0001$ .

(I-J) Quantification of % anti-FLAG-20-nm gold particle binding to RAD-51-ssDNA filaments (including aggregated filaments) formed on circular ssDNA  $\pm$  RFS-1/RIP-1 from 2 independent experiments. \*\*\*\* Two-tailed Chi-square test of independence,  $p < 0.0001$ .

**Figure S2**

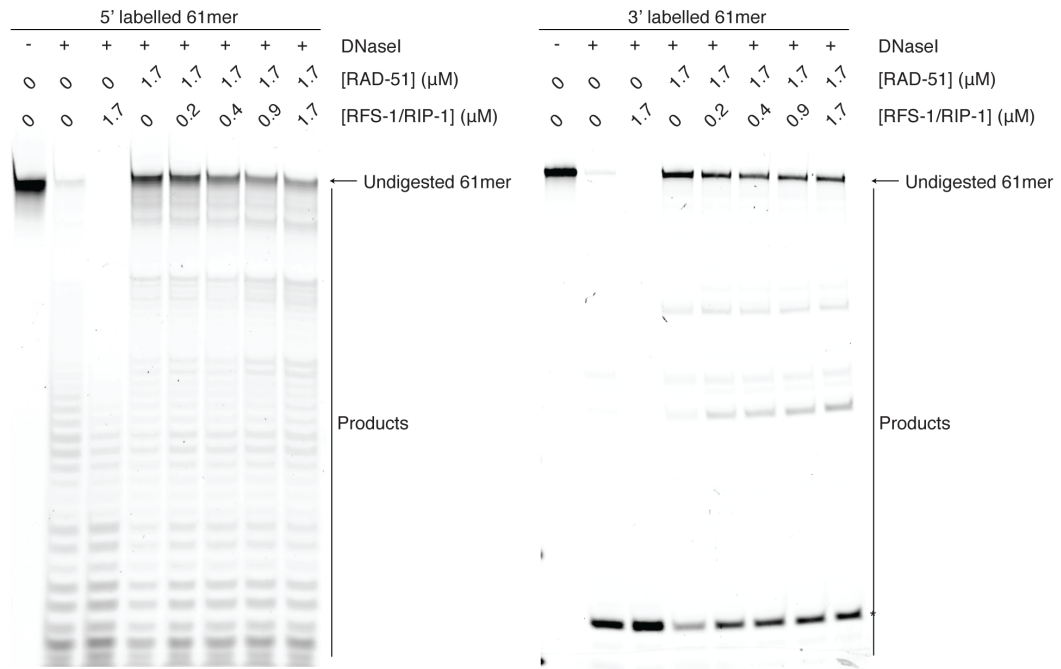

**Figure S2: RFS-1/RIP-1 propagates filament DNaseI sensitization beyond immediate proximity to the 5' filament end. Related to Figure 3.**

DNaseI protection assay on protein-DNA complexes formed by RAD-51 and RFS-1/RIP-1 on 5' or 3' fluorescently-labelled 61mer ssDNA. Products were resolved by denaturing PAGE.

Figure S3

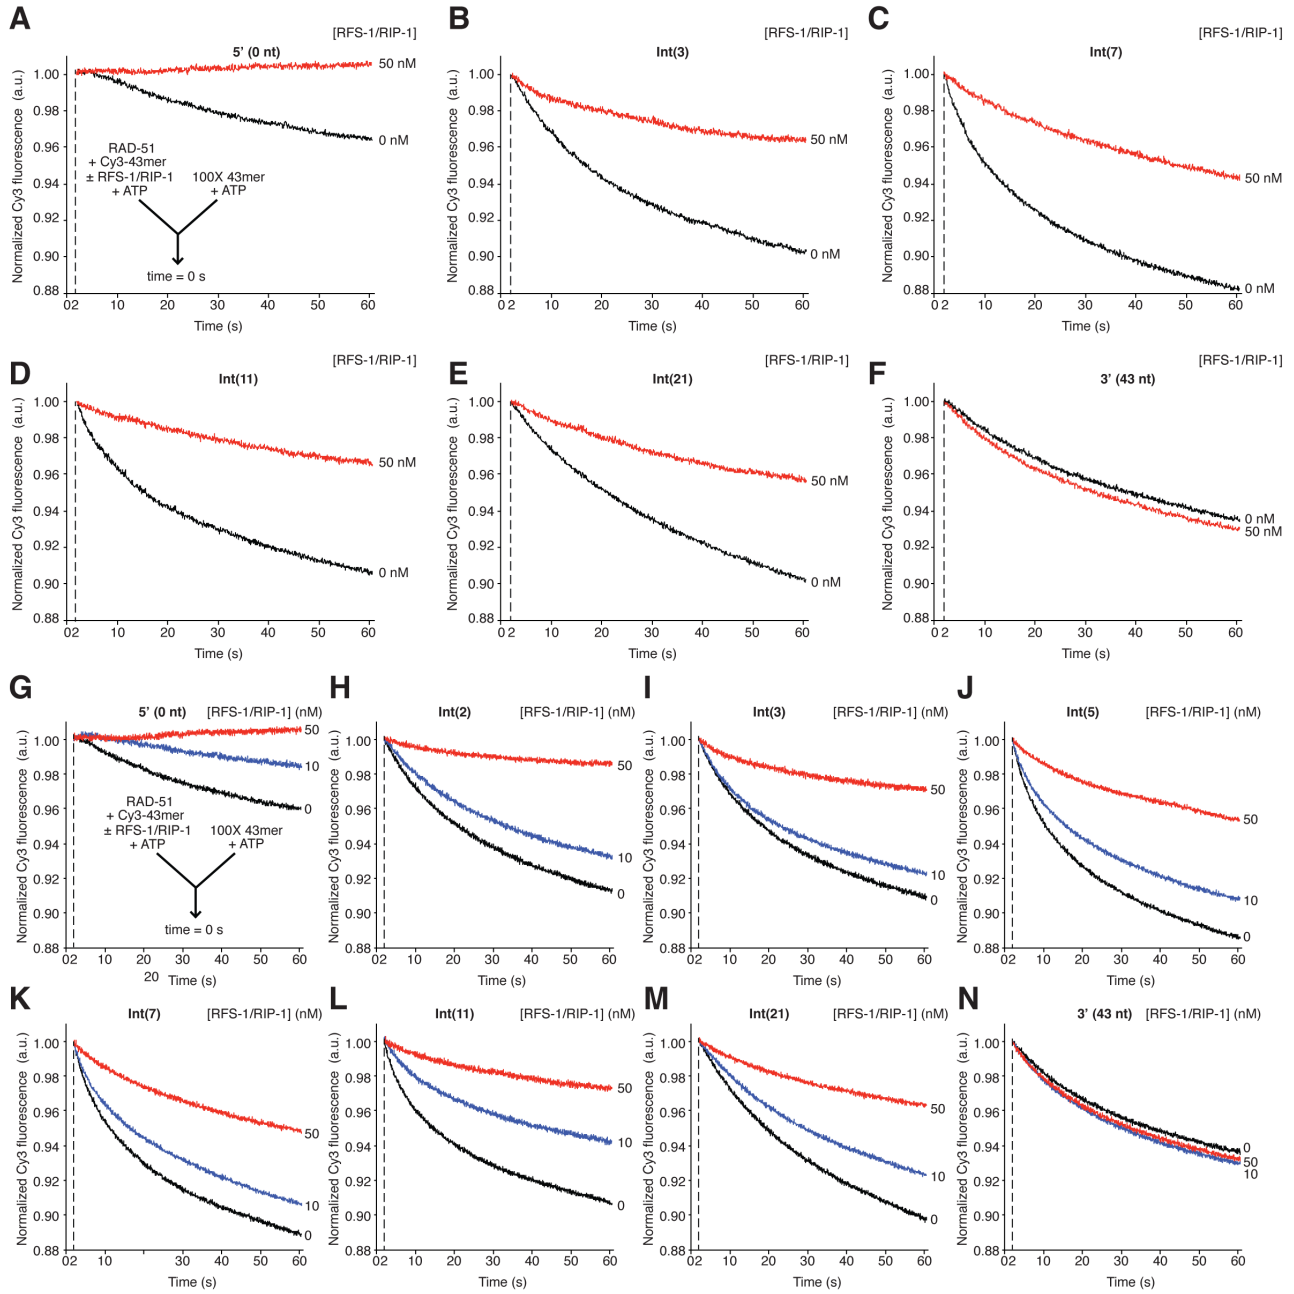

**Figure S3: RFS-1/RIP-1 propagates filament stabilization beyond immediate proximity to the 5' filament end. Related to Figure 3.**

(A-F) Average normalized Cy3-43mer fluorescence profiles plotted as a function of time for the data in [Figure 3F](#). The arrow indicates the components of the two syringes rapidly mixed at the 0 s time point in a stopped-flow instrument. RAD-51-ssDNA filaments pre-formed with 1  $\mu$ M RAD-51 + 15 nM Cy3-43mer  $\pm$  50 nM RFS-1/RIP-1 for 10 min were mixed with 100-fold excess unlabelled 43mer. Label position is indicated top centre of each profile (n = 6-8).

(G-N) Average normalized Cy3-43mer fluorescence profiles plotted as a function of time for the data in [Figure 3G](#). RAD-51-ssDNA filaments pre-formed with 1  $\mu$ M RAD-51 + 15 nM Cy3-43mer and the indicated concentration of RFS-1/RIP-1 for 10 min were mixed with 100-fold excess unlabelled 43mer. Label position is indicated top centre of each profile (n = 5-8).

Figure S4

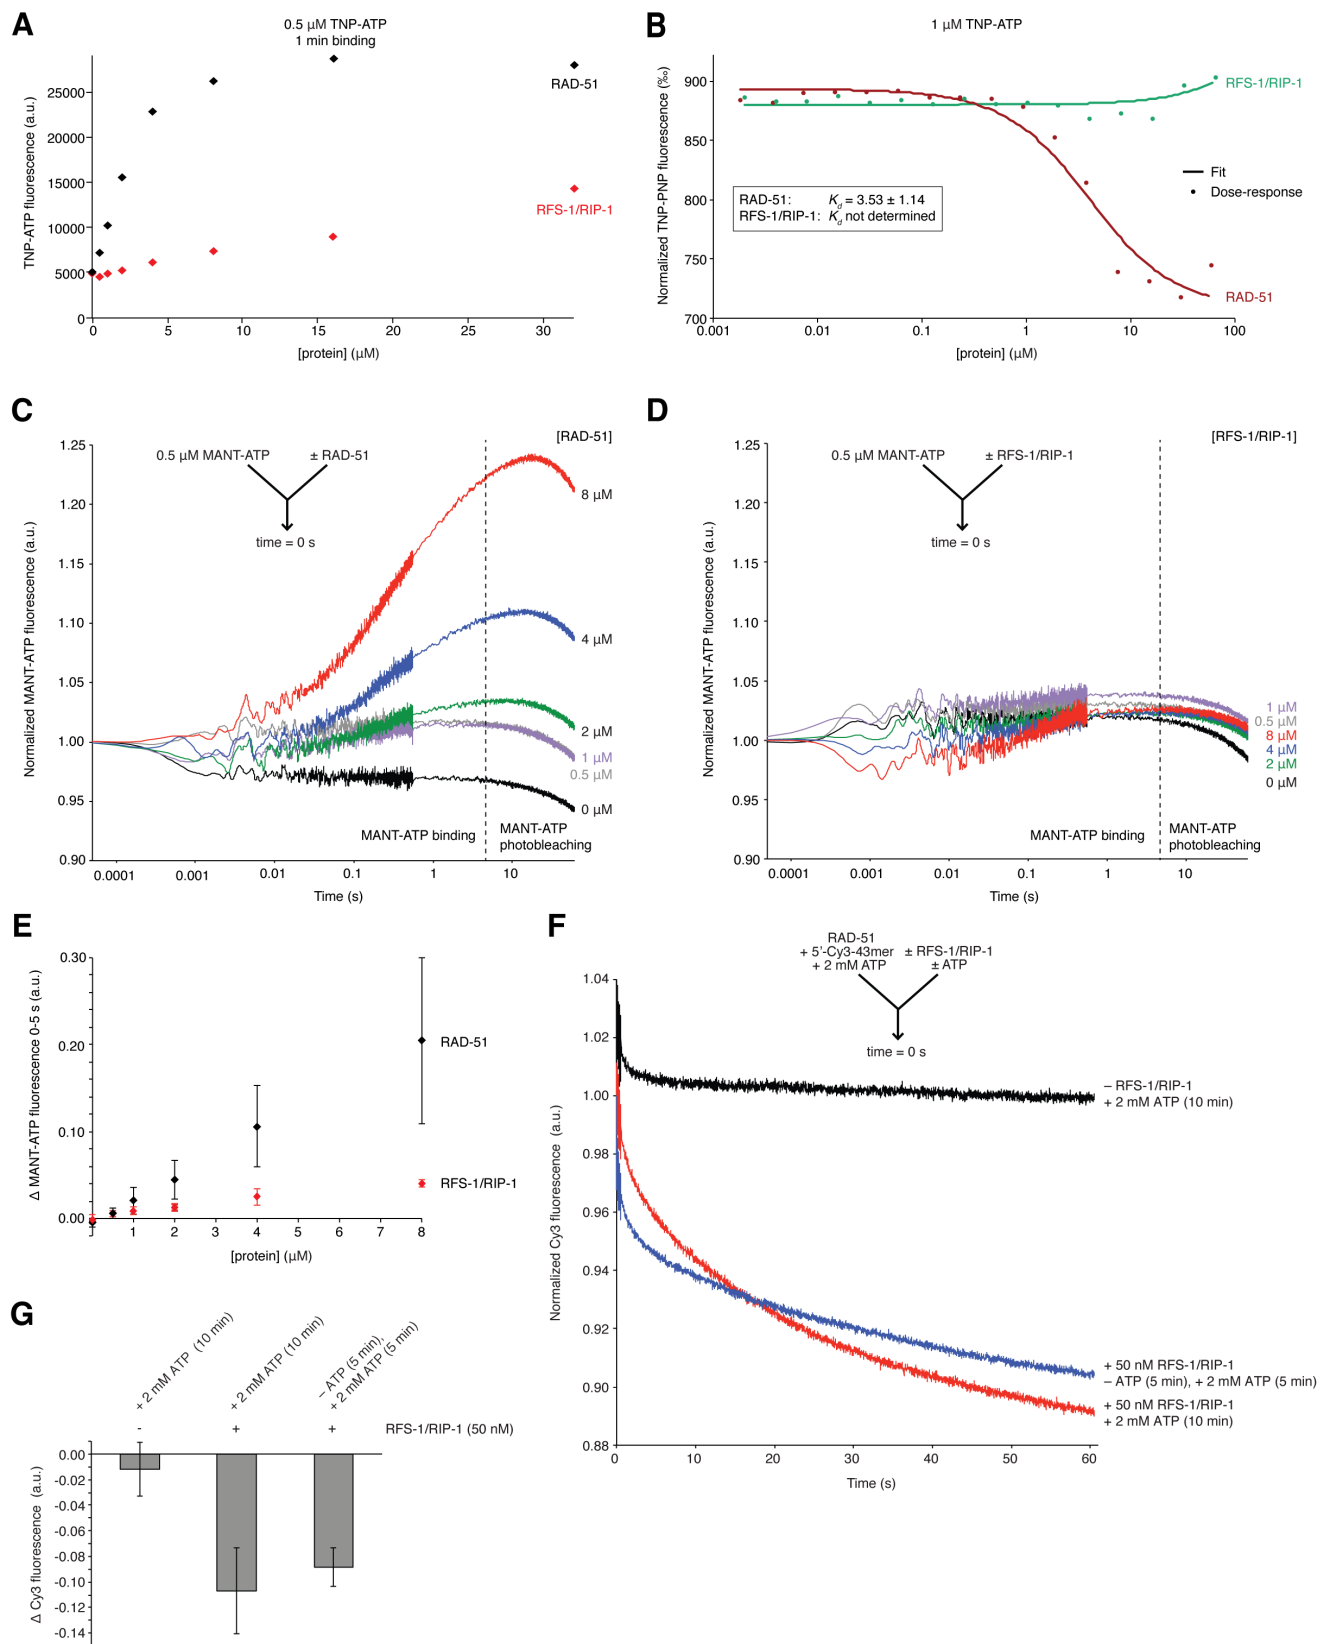



**Figure S4: RFS-1/RIP-1 binds nucleotides weakly and slowly relative to RAD-51. Related to Figure 5.**

(A) TNP-ATP fluorescence measured in a microplate reader following 1 minute binding to different concentrations of RAD-51 or RFS-1/RIP-1.

(B) Microscale thermophoresis measurements of normalized TNP-ATP fluorescence upon binding to different concentrations of RAD-51 or RFS-1/RIP-1. Experimentally determined dose-response values and attempted fit results are indicated.

(C-D) Average normalized MANT-ATP fluorescence profiles plotted as a function of time. The arrow indicates the components of the two syringes rapidly mixed at the 0 s time point in a stopped-flow instrument. The indicated concentrations of protein were mixed with 0.5  $\mu$ M MANT-ATP. (C) RAD-51 (n = 5-7). (D) RFS-1/RIP-1 (n = 7).

(E) Graph of protein concentration-dependence of  $\Delta$  MANT-ATP fluorescence for MANT-ATP binding to RAD-51 and RFS-1/RIP-1 for the data presented in C-D (errors: s.d.).

(F) Average normalized Cy3-43mer fluorescence profiles plotted as a function of time. RAD-51-ssDNA filaments pre-formed with 1  $\mu$ M RAD-51 + 15 nM Cy3-43mer + 2 mM ATP for 10 min were mixed with buffer or 50 nM RFS-1/RIP-1 either pre-incubated for 10 min (red and black traces) or with buffer + 50 nM RFS-1/RIP-1 pre-incubated without nucleotide for 5 min before addition of 2 mM ATP for a further 5 min (blue trace) (n = 6-9).

(G) Graphs of average  $\Delta$  Cy3 fluorescence for the data presented in F (errors: s.d.).

## Supplemental Experimental Procedures:

### Protein expression and purification

RAD-51 and RFS-1/RIP-1 were purified as described previously (Taylor et al., 2015). RAD-51 was expressed using the Champion pET-SUMO system (Life Technologies) in BL21(DE3) One Shot *E. coli*. The culture was grown in LB supplemented with 50 µg/ml kanamycin at 37 °C to OD<sub>600</sub> of 0.6-0.8, before induction for 4 h with 1 mM IPTG at 30 °C. Pellets were resuspended in 400 ml ice cold Lysis Buffer (50 mM potassium phosphate (pH 7.8), 1 M KCl, 10% glycerol) supplemented with cOmplete, EDTA-free protease inhibitor cocktail tablets (Roche) (1 tablet per 25 ml buffer), and mixed well with a magnetic stirrer at 4 °C until the mixture was homogenous. All subsequent steps were carried out at 4 °C. The cells were lysed by addition of Triton X-100 to 0.1%. The lysate was sonicated and cleared using a Ti45 rotor (Beckman Coulter) at 40,000 rpm for 60 min. Imidazole was added to the supernatant to a final concentration of 25 mM and applied to 12 ml bed volume of Ni-NTA agarose affinity gel (Qiagen 30210) which had been pre-washed with Binding Buffer (50 mM potassium phosphate (pH 7.8), 1 M KCl, 10% glycerol, 25 mM imidazole (pH 7.5)). The protein was bound to the beads by rotating for 2 h then applied to 6 x 25 ml batch purification columns. The flowthrough was discarded and the beads washed with 300 ml Binding Buffer and 300 ml Binding Buffer containing 50 mM imidazole (50 ml per column). The protein was eluted with Binding Buffer containing 200 mM imidazole by passing 8 ml twice over each column then washing with a further 4 ml of this buffer per column (total eluate volume 72 ml), and dialyzed against 4 L Dialysis Buffer (20 mM Tris-HCl (pH 8.0), 300 mM KCl, 10% glycerol) overnight using 10 kDa MWCO SnakeSkin dialysis tubing (Thermo Scientific). Some precipitate was observed the following day, but most protein remained in solution. The His-SUMO tag was cleaved to yield native RAD-51 by addition of His-tagged Ulp1 SUMO protease for 45 min. The protein was centrifuged and the soluble fraction collected and bound to the same batch of NiNTA agarose affinity gel used for purification after regeneration according to the manufacturer's instructions to remove the SUMO protease and His-SUMO tag. The flowthrough containing native RAD-51 was collected and the resin washed with an additional 18 ml (3 ml per column) of Dialysis Buffer. These were pooled (total 90 ml) and mixed at 1:1 ratio with Dilution Buffer (20 mM Tris-HCl (pH 8.0), 10% glycerol, 2 mM EDTA, 1 mM DTT) (total 180 ml) to reduce salt concentration to 150 mM KCl. The protein was bound to a 1 ml Mono Q 5/50 GL column (GE Healthcare) at 0.5 ml / min using an Äkta Explorer HPLC system and washed with 30 ml R buffer (20 mM Tris-HCl (pH 8.0), 10% glycerol, 1 mM EDTA, 0.5 mM DTT) supplemented with 100 mM KCl then 20 ml R buffer supplemented with 150 mM KCl. The protein was eluted with a 30 ml gradient 150-640 mM KCl in R buffer and 0.5 ml fractions collected. The peak fractions were pooled and either dialysed against Storage Buffer for 1 h, frozen in small aliquots in liquid nitrogen and stored at -80 °C, or concentrated and frozen directly in the elution buffer. This method typically yielded 1.5-2.5 mg/ml recombinant RAD-51 (40-65 µM) which could be concentrated as high as 640 µM without precipitation.

RFS-1/RIP-1 was expressed in budding yeast cells by growing a 100 L culture in a 120 L BIOFLO 5000 fermenter (New Brunswick Scientific) in YP media + 2% raffinose at 30°C, pH 5.8, agitation 200 rpm and airflow 20 L/min until OD<sub>600</sub> of 0.7-0.8, before induction for 5 h with 2% galactose. The cells were harvested and washed twice with Yeast Wash Buffer (25 mM HEPES-KOH (pH 7.5), 1 M sorbitol) then once with Buffer K (45 mM HEPES-KOH, 10% glycerol, 0.1 M potassium glutamate, 5 mM magnesium acetate) supplemented with 0.02% NP-40. The cells were then resuspended in 70 ml buffer K + 0.02% NP-40 supplemented with cOmplete, EDTA-free protease inhibitor cocktail tablets (Roche) (1 tablet per 25 ml buffer) and frozen dropwise in liquid nitrogen. Cells were lysed by crushing in a freezer mill (SPEX CertiPrep 6850) for 6 x 2 min cycles at rate 15 under liquid nitrogen and the frozen cell powder stored at -80°C. For purification, the cell powder was thawed to room temperature in a water bath, diluted with Buffer K and the potassium glutamate concentration adjusted to 0.5 M and mixed well with a magnetic stirrer at 4°C until the lysate was homogenous. All subsequent steps were carried out at 4 °C. The lysate was cleared in an Optima LE-80K Ultracentrifuge (Beckman Coulter) using a Ti45 rotor at 40,000 rpm for 90 min and the supernatant was applied to 10 ml bed volume of anti-FLAG M2 affinity gel (Sigma A2220). The protein was bound to the beads by rotating overnight then applied to 5 x 25 ml batch purification columns. The flow-through was discarded and the beads washed with 750 ml Buffer K (150 ml per column). The protein was eluted with 1 mg/ml 3xFLAG peptide in Buffer K by passing 2 ml twice over each column then washing with 4 ml Buffer K per column (total eluate volume 30 ml), and dialyzed against 4 L Storage Buffer (20 mM Tris-acetate (pH 8.0), 100 mM potassium acetate, 10% glycerol, 1 mM EDTA, 0.5 mM DTT) overnight using 10 kDa MWCO SnakeSkin dialysis tubing (Thermo Scientific). The protein was then concentrated on a 30 kDa MWCO Amicon Ultra-15 Centrifugal Filter Unit pre-washed with water and Storage Buffer to a final volume of 1 ml, frozen in small aliquots in liquid nitrogen and stored at -80 °C. This method typically yielded 3-4.4 mg/ml recombinant RFS-1/RIP-1 (55-80 µM complex) devoid of detectable nuclease activity. For electron microscopy studies, 100 µl concentrated RFS-1/RIP-1 was subsequently applied to a Superdex S200 5/150 GL column (GE Healthcare) in Storage Buffer and the peak fractions collected, pooled and stored in 1.45 µM aliquots.

## EMSA

RAD-51 was mixed with a master mix containing 645 nM (nucleotides) of the indicated Cy3-labelled (dT)<sub>43</sub> oligonucleotide, 20 mM Tris-HCl (pH 7.5), 8% glycerol, 1 mM DTT, 50 mM sodium acetate, 2 mM MgCl<sub>2</sub> and 2 mM ATP, in 10 µl reaction volume at 25°C. Protein-ssDNA complexes were crosslinked with 0.25% glutaraldehyde for 10 min at 25 °C. Reactions were resolved on 1% agarose gels in 1X TBE (70 V, 2 h 20 min) at 4 °C. Gels were imaged on a FLA-9000 scanner (Fujifilm).

## Nuclease protection assays

Proteins were diluted from concentrated stocks into T Buffer (25 mM Tris-HCl (pH 7.5), 10% glycerol, 0.5 mM EDTA (pH 8.0), 50 mM KCl), which was also used in no protein controls. Proteins were pre-incubated for 5 min on ice then mixed with 7310 nM (nucleotides) 5'- or 3'-fluorescein-labelled 61mer oligonucleotide (GACGCTGCCGAATTCTACCAGTGCCTTGCTAGGACATCTTTGCCACCTGCAGTTTACCC) in 10 mM Tris-HCl (pH 7.5), 50 mM KCl, 1 mM DTT, 1 mM ATP, 1 mM MgCl<sub>2</sub>, 1 mM CaCl<sub>2</sub>, in 10 µl reaction volume at 25 °C for 10 min. 1 µl (2 U) bovine pancreatic DNaseI (New England Biolabs) was then added for 20 min at 25 °C. The samples were deproteinized with 0.125% SDS and 12.5 µg proteinase K for 10 min at 37 °C and resolved in 10% native polyacrylamide gels in 1X TBE (110 V, 50 min) or in 20% denaturing polyacrylamide urea gels in 1X TBE (15 W, 90 min). Gels were imaged on a FLA-9000 scanner (Fujifilm) and quantified with Multi Gauge V3.2 (Fujifilm). After adjusting for background, the % protection was determined for all samples then normalized to the value for RAD-51 only. Average relative protection values from at least 5 experiments were then determined.

## Immuno-gold electron microscopy

RFS-1/RIP-1 was purified via a gel filtration column prior to use as described above. Anti-FLAG antibody (Sigma F3165) was conjugated to 20-nm gold particles using the InnovaCoat Gold Conjugation Mini kit (Innova Biosciences). 1 µM RAD-51 ± 0.1 µM RFS-1/RIP-1 and 1 µM (nucleotides) of linearized PhiX ssDNA (length: 5386 nucleotides) (gift of Michael McIlwraith and Stephen West) or 6 µM (nucleotides) of p8064 circular ssDNA (length: 8064 nucleotides) (Tilibit Nanosystems) were co-incubated in 20 mM Triethanolamine-HCl (pH 7.5), 8% glycerol, 1 mM DTT, 50 mM sodium acetate, 2 mM MgCl<sub>2</sub>, 2 mM ATP for 10 min at 25 °C, before incubation with anti-FLAG-20-nm gold for a further 5 min at 25 °C. Samples were applied to glow-discharged continuous carbon-coated grids, negatively stained by 2% uranyl acetate, and by negative stain as described previously (Taylor et al., 2015).

For quantification of anti-FLAG-20-nm gold binding to filaments in [Figure 2E-G](#), images (2120 nm x 1511 nm) were acquired at nominal magnification 67,000X from between 70 and 125 fields of view per condition, and scored for number of anti-FLAG-20-nm gold particles unbound to filaments or bound to filaments >50 nm in length. Only gold particles directly on filaments and not those juxtaposed were counted. Clusters of >3 gold particles were not counted. Filament clumps of >4 filaments were not counted.

For quantification of filaments associated with anti-FLAG-20-nm gold in [Figure S1G-H](#), the same images were scored for number of filaments bound or unbound to anti-FLAG-20-nm gold. Clumps of filaments indistinguishable as individual filaments for counting were scored as one. Clusters of >3 gold particles were not counted. Anti-FLAG-20-nm gold particles were also re-scored as unbound to filaments or bound to filaments by these alternative criteria ([Figure S1I-J](#)), and showed a similar fold enrichment in the presence of RFS-1/RIP-1 to [Figure 2E-F](#).

Statistical analysis was performed in GraphPad Prism 6 (GraphPad Software). All images were scored by a researcher blinded to the identity of the samples.

## Stopped-flow assays and data analysis

Stopped-flow experiments were performed using an SFM-300 stopped-flow machine (Bio-Logic) fitted with a MOS-200 monochromator spectrometer (Bio-Logic) with excitation wavelength set at 545 nm. Fluorescence measurements were collected with a 550 nm long pass emission filter. The machine temperature was maintained at 25 °C with a circulating water bath.

For all experimental setups, a master mix containing all common reaction components for each of the two syringes was prepared to which variable components were added to generate the mixtures for individual syringes for different experimental conditions. These individual syringe mixtures are indicated in the mixing schemes. Since equal volumes were injected into the mixing chamber from each syringe, the two solutions became mutually diluted. Therefore, all reaction components common to each syringe were prepared at the final concentration, whereas reaction components present in only one syringe were added at twice the desired final concentration. All concentrations quoted represent final concentrations after mixing. Components of each syringe were pre-incubated for 10 min before the start of experiments to allow the contents to reach equilibrium.

All reactions were performed in Stopped Flow Buffer (50 mM Tris-HCl (pH 7.5), 5 mM MgCl<sub>2</sub>, 50 mM NaCl, 2 mM ATP) except where indicated to determine the nucleotide-dependency of RFS-1/RIP-1 activity in [Figure 5](#). All reactions contained 15 nM (moles) Cy3 fluorescently labelled (dT)<sub>43</sub> or (dT)<sub>23</sub> oligonucleotide (Cy3-43mer or Cy3-23mer), with the fluorophore either conjugated to the 5' or 3' end or integrated into the DNA backbone after the indicated nucleotide

position. Proteins were added directly from concentrated stocks. Unlabelled (dT)<sub>43</sub> or (dT)<sub>23</sub> oligonucleotide was used at 1500 nM (moles) (100-fold excess) in competition experiments. For all experiments, controls were also performed for buffer alone with and without DNA to confirm fluorescence signal stability over the time course of the experiments (data not shown). For experiments on pre-formed RAD-51 filaments we employed a saturating concentration of RAD-51 (1 μM on 43mer, 750 nM on 23mer), to ensure all ssDNA present was coated by RAD-51 filaments.

Fluorescence measurements for most experiments were collected according to the following protocol: (1) every 0.00005 s from 0-0.05 s; (2) every 0.0005 s from 0.05-0.56 s; (3) every 0.02 s from 0.56-60.54 s.

For each condition analysed, traces were collected from between four and twenty-two independent reactions (n = 4-22, see individual figure legends for details). In Figure 4, these were pooled from two or three independent experiments. For presentation, average traces for each experiment were generated. Absolute fluorescence values were converted to arbitrary units by a normalization procedure to facilitate comparison. For all experiments the raw data were normalized to the same fluorescence value for the 0 s time point, except for the unlabelled DNA competition experiments (Figure 3, 4, S2) where raw data were normalized to the same value for Cy3 fluorescence at the 2.01998 s time point and truncated before this, as previously (Taylor et al., 2015).

For analysis, for all experiments in Figures 2, 5, S1 and S4F, ten-point moving averages were calculated on each individual normalized trace, which were used to define initial (0 s) and final (60.54 s) fluorescence values and Δ Cy3 fluorescence values for each experiment. Half-times in Figure S1 were measured as the time points where the fluorescence from moving averages was closest to the value calculated for the Δ Cy3 fluorescence midpoint. Average values and associated standard deviations were then calculated. For competition experiments (Figure 3, 4, S2), the relatively small changes in fluorescence observed meant the data was too noisy for analysis from moving averages for Δ Cy3 fluorescence in this way. For these experiments, Δ Cy3 fluorescence values were calculated on each individual normalized trace as the difference between the mean fluorescence values measured across all time points from 1.01998 to 2.99998 s (start value, on either side of the adjusted start at 2 s) and 58.54 to 60.54 s (end value). Average values and associated standard deviations were then calculated. Positive and negative Δ Cy3 fluorescence values represent increases and decreases in fluorescence respectively. To determine the % of Cy3 fluorescence reduction observed for RAD-51 only in Figures 3F, G and 4G, J, the Δ Cy3 fluorescence value for each trace calculated in the presence of RFS-1/RIP-1 was divided by the average Δ Cy3 fluorescence value for RAD-51 alone and multiplied by 100. Average values and associated standard deviations or standard errors of the mean were then calculated.

For experiments testing protein binding to MANT-ATP (ThermoFisher Scientific M12417), reactions were performed in Stopped Flow Buffer without ATP. MANT-ATP (final concentration 0.5 μM) was mixed with increasing amounts of either RAD-51 or RFS-1/RIP-1. Excitation wavelength was set at 365 nm and fluorescence measurements were collected with a 395 nm long pass emission filter. For analysis, Δ MANT-ATP fluorescence values for the binding phase (before photobleaching) were calculated on each individual normalized trace as the difference between the mean fluorescence values measured across all time points from 0 to 0.01 s (start value) and 4.51998 to 5.49998 s (end value, on either side of 5 s). Average values and associated standard deviations were then calculated.

### TNP-ATP fluorescence measurements and microscale thermophoresis

Fluorescence intensity of TNP-ATP (Sigma-Aldrich SML0740) stained protein solutions was measured using Infinity F500 microplate reader (Tecan Group Ltd.) in 96 well plates (25 °C). The excitation and emission wavelengths were chosen at 485 (20) nm and 535 (25) nm, respectively. Increasing amounts of either RAD-51 or RFS-1/RIP-1 were mixed with TNP-ATP (final concentration 0.5 μM) and samples measured after 1 minute.

Binding affinity quantifications via microscale thermophoresis were performed using the Monolith NT.115 (Nanotemper Technologies). Affinity measurements were performed by using MST buffer (20 mM Tris-HCl (pH 7.5), 150 mM NaCl, 10 mM MgCl<sub>2</sub>), supplemented with 0.05% Tween-20. Samples were loaded into NT.115 standard capillaries (NanoTemper Technologies). Measurements were performed at 25 °C, 100% LED, 40% IR laser power and constant concentration of 1 μM TNP-ATP and increasing concentration of purified proteins. Data were analysed by the MO.Affinity Analysis software (NanoTemper Technologies).

### ssDNA curtains assays

Flowcells were prepared as previously described (Gibb et al., 2012; Gorman et al., 2010). The single-stranded DNA substrates were prepared by rolling circle replication using an M13mp18 single strand plasmid annealed to a biotinylated primer, as described (Gibb et al., 2012; Gibb et al., 2014). For the extension and visualization of the ssDNA-ScRPA-eGFP curtain, *Saccharomyces cerevisiae* RPA-eGFP (1 nM) was flown in at 0.8 ml/min with BSA buffer (40 mM Tris-HCl (pH 8.0), 2 mM MgCl<sub>2</sub>, 1 mM DTT, and 0.2 mg/ml BSA). After 2 minutes, 150 μl of 7 M urea was injected to remove protein aggregates and unresolved secondary structures followed by 15 minutes of continuous flow of 1 nM ScRPA-eGFP in BSA buffer.

RAD-51 filaments were assembled using CeH buffer (50 mM Tris-HCl (pH 7.5), 50 mM NaCl, 5 mM MgCl<sub>2</sub>, 2 mM ATP, 1 mM DTT, 0.2 mg/ml BSA) unless otherwise indicated. Excess ScRPA-eGFP was flushed out with CeH buffer at 1 ml/min for a minimum of 2 minutes before injecting the indicated concentration of RAD-51. For sample injections of

RFS-1/RIP-1, the flowcell chamber is first equilibrated to the appropriate buffer (CeH buffer with the nucleotide RFS-1/RIP-1 is incubated in and/or ScRPA-eGFP) with a one minute buffer flow at 1 ml/min. RFS-1/RIP-1 was pre-incubated with 2 mM ATP, ADP or ATP $\gamma$ S as indicated for at least 10 minutes prior to introduction to the flow cell.

For visualization, a 488 nm laser is used to illuminate the eGFP molecules. 100 msec exposure images are captured at 20 second intervals unless indicated otherwise. For analysis, kymograms of individual ssDNA molecules were generated using Fiji (ImageJ 1.48b, Wayne Rasband, National Institutes of Health, USA). Fluorescence intensity of the kymograms are adjusted based on the intensity profile of the background kymograms. The average pixel intensity for each time point is normalized so that the first frame has an intensity of 1.

#### **Supplemental References:**

Gibb, B., Silverstein, T.D., Finkelstein, I.J., and Greene, E.C. (2012). Single-Stranded DNA Curtains for Real-Time Single-Molecule Visualization of Protein-Nucleic Acid Interactions. *Analytical Chemistry* 84, 7607-7612.

Gorman, J., Fazio, T., Wang, F., Wind, S., and Greene, E.C. (2010). Nanofabricated Racks of Aligned and Anchored DNA Substrates for Single-Molecule Imaging. *Langmuir* 26, 1372-1379.
